# Supplementary material for: Total synthesis of nafuredin B
Source: Royal Society of Chemistry journal article supplement (doi:10.1039/d0ob00370k), 2020-01-01

## **Total Synthesis of Nafuredin B**

*Gour Hari Mandal, Dhiman Saha and Rajib Kumar Goswami\**

School of Chemical Sciences,  
Indian Association for the Cultivation of Science, Jadavpur,  
Kolkata-700032, India.  
Email: [ocrkg@iacs.res.in](mailto:ocrkg@iacs.res.in)

### **Supporting Information**

- 1.  $^1\text{H}$  and  $^{13}\text{C}$  NMR Comparison between Synthetic Compounds and Isolated Nafuridin B: S2**
- 2. Copies of  $^1\text{H}$ -NMR,  $^{13}\text{C}$ -NMR, 2D-NMR and HRMS Spectra: S3-S35**

**1. Table S1: <sup>1</sup>H and <sup>13</sup>C NMR Comparison between Synthetic and Isolated Nafuridin B**

| Position | Isolated compound<br>$\delta_{\text{H}}$ in ppm, ( <i>J</i> in Hz) | Synthetic compound<br>$\delta_{\text{H}}$ in ppm, ( <i>J</i> in Hz) | Isolated compound<br>$\delta_{\text{C}}$ in ppm | Synthetic compound<br>$\delta_{\text{C}}$ in ppm |
|----------|--------------------------------------------------------------------|---------------------------------------------------------------------|-------------------------------------------------|--------------------------------------------------|
| 1        |                                                                    |                                                                     | 163.3                                           | 163.3                                            |
| 2        | 5.83, d (9.8)                                                      | 5.85, d (9.8)                                                       | 118.0                                           | 118.1                                            |
| 3        | 6.89, d (9.8)                                                      | 6.88, d (9.7)                                                       | 156.3                                           | 156.2                                            |
| 4        |                                                                    |                                                                     | 68.0                                            | 68.0                                             |
| 5        | 4.73, d (6.7)                                                      | 4.74, d (6.5)                                                       | 84.4                                            | 84.3                                             |
| 6        | 5.64, m                                                            | 5.70, m                                                             | 124.5                                           | 124.5                                            |
| 7        | 6.30, dd (10.5, 14.8)                                              | 6.31, dd (10.5, 15.2)                                               | 134.7                                           | 134.7                                            |
| 8        | 6.08, dd (10.5, 15.3)                                              | 6.10, dd (10.6, 15.3)                                               | 127.7                                           | 127.7                                            |
| 9        | 5.68, m                                                            | 5.75, m                                                             | 142.1                                           | 142.2                                            |
| 10       | 2.41, m                                                            | 2.42, m                                                             | 34.7                                            | 34.7                                             |
| 11       | 2.04, m, 1.95, dd (7.6, 13.3)                                      | 2.06, m, 1.95, dd (7.7, 13.4)                                       | 47.3                                            | 47.3                                             |
| 12       |                                                                    |                                                                     | 134.5                                           | 134.5                                            |
| 13       | 5.73, dd (10.8, 14.8)                                              | 5.67, d (8.9)                                                       | 126.9                                           | 126.9                                            |
| 14       | 6.16, dd (10.8, 15.1)                                              | 6.18, dd (10.7, 15.2)                                               | 125.2                                           | 125.2                                            |
| 15       | 5.43, dd (7.8, 15.1)                                               | 5.44, dd (7.8, 15.1)                                                | 138.4                                           | 138.5                                            |
| 16       | 2.07, m                                                            | 2.07, m                                                             | 38.4                                            | 38.4                                             |
| 17       | 1.27, m                                                            | 1.28, m                                                             | 29.7                                            | 29.7                                             |
| 18       | 0.81, d (7.4)                                                      | 0.81, t (7.4)                                                       | 12.1                                            | 12.1                                             |
| 19       | 1.09, s                                                            | 1.10, s                                                             | 21.4                                            | 21.5                                             |
| 20       | 0.92, d (6.7)                                                      | 0.93, d (6.9)                                                       | 20.1                                            | 20.1                                             |
| 21       | 1.67, s                                                            | 1.67, s                                                             | 16.7                                            | 16.7                                             |
| 22       | 0.94, d (6.7)                                                      | 0.95, d (6.6)                                                       | 20.5                                            | 20.5                                             |

## 2. Copies of $^1\text{H-NMR}$ , $^{13}\text{C-NMR}$ , 2D-NMR and HRMS Spectra

### $^1\text{H-NMR}$ spectrum of compound 13 (300 MHz, $\text{CDCl}_3$ ):

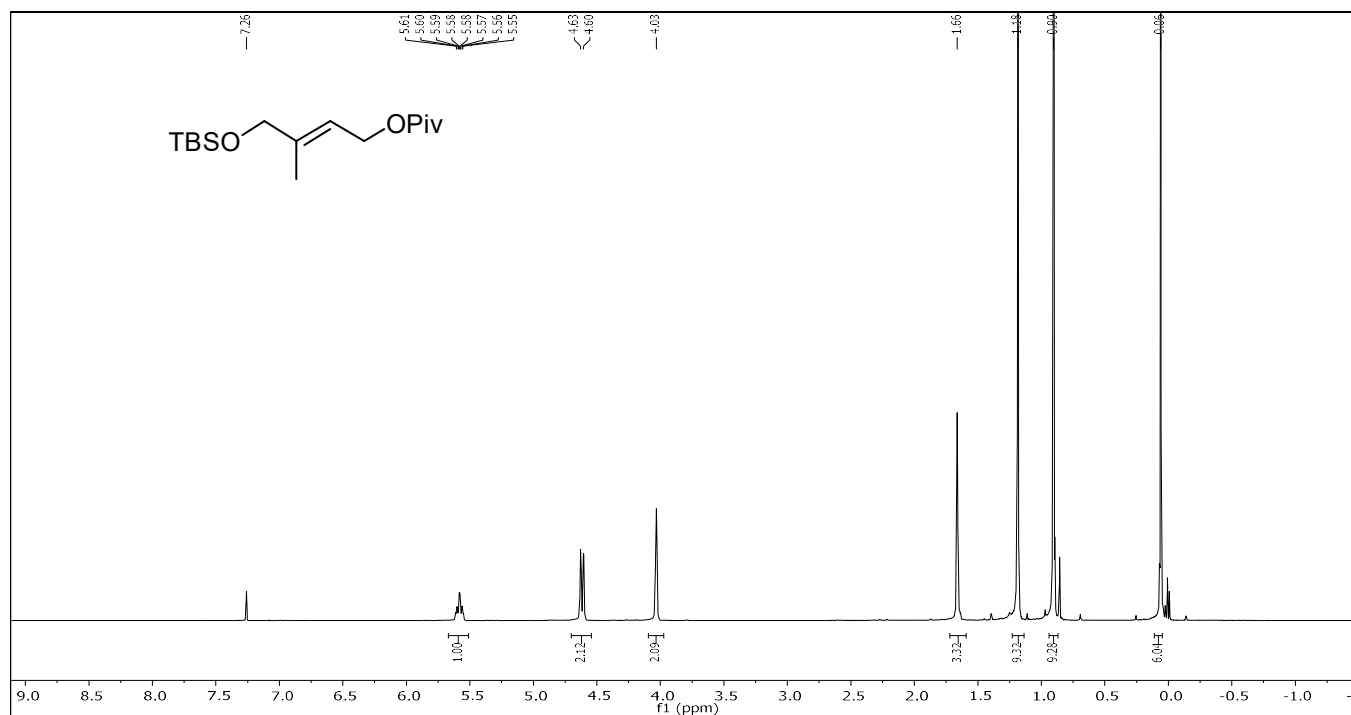

### $^{13}\text{C-NMR}$ spectrum of compound 13 (75 MHz, $\text{CDCl}_3$ ):

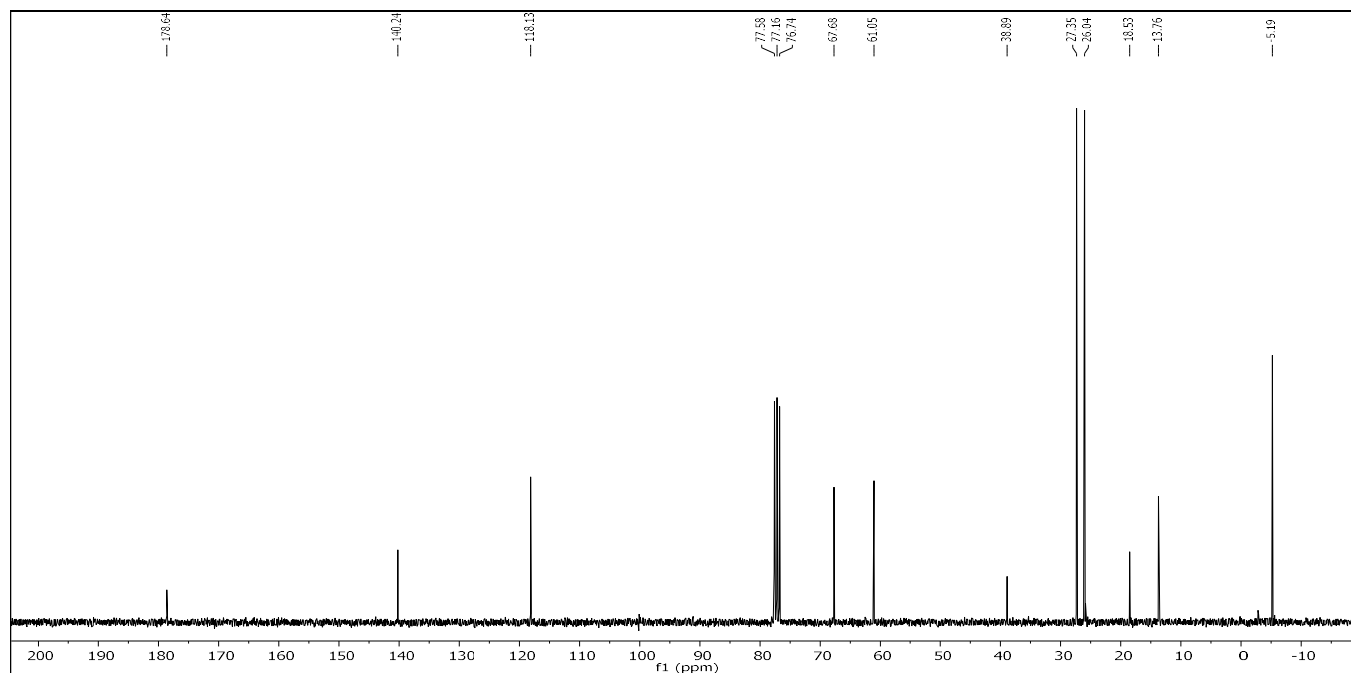

**<sup>1</sup>H-NMR spectrum of compound 14 (300 MHz, CDCl<sub>3</sub>):**

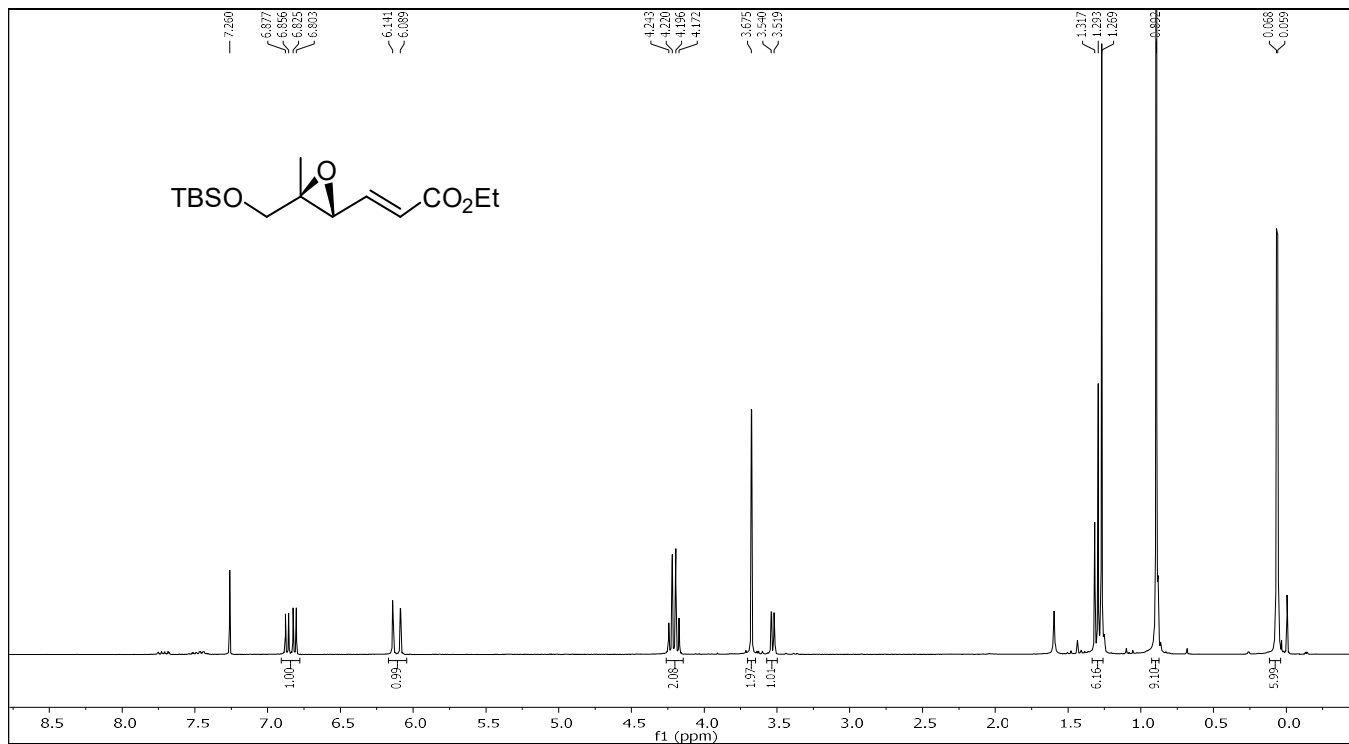

**<sup>13</sup>C-NMR spectrum of compound 14 (75 MHz, CDCl<sub>3</sub>):**

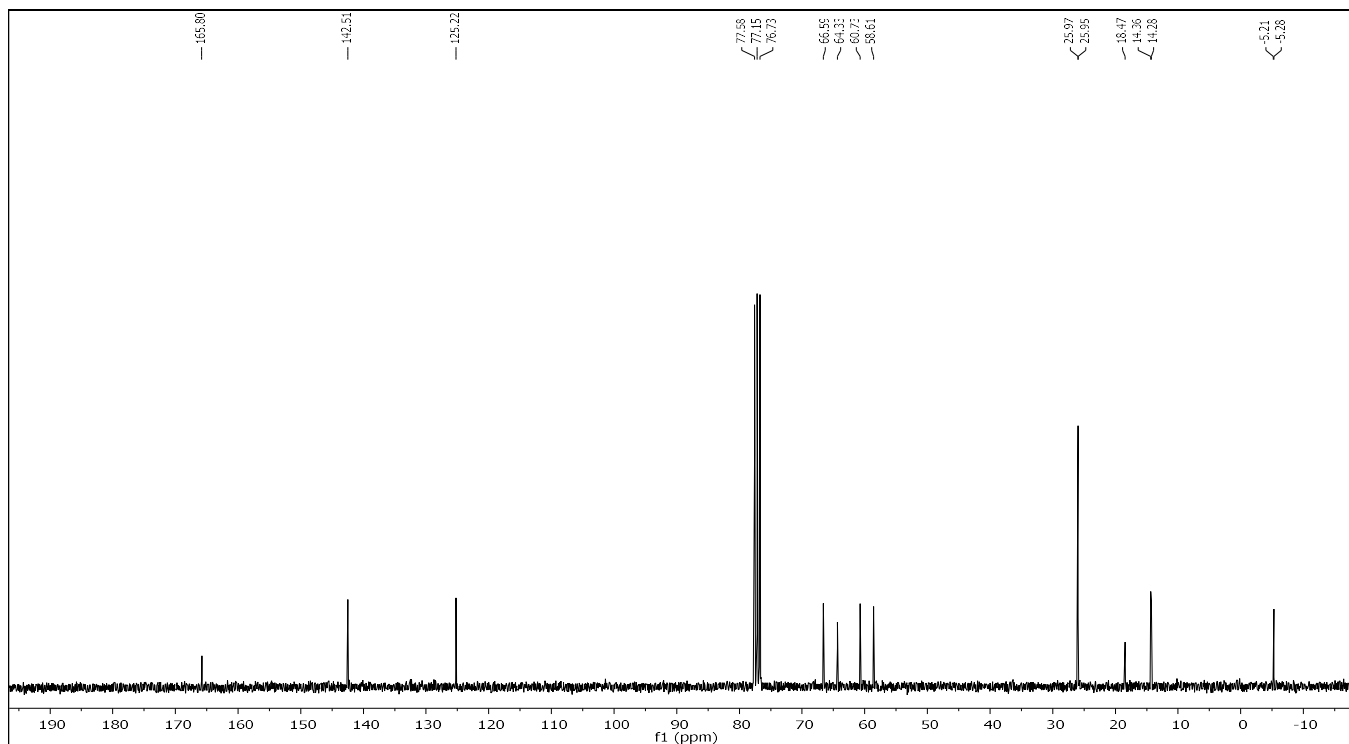

**<sup>1</sup>H-NMR spectrum of compound 11 (300 MHz, CDCl<sub>3</sub>):**

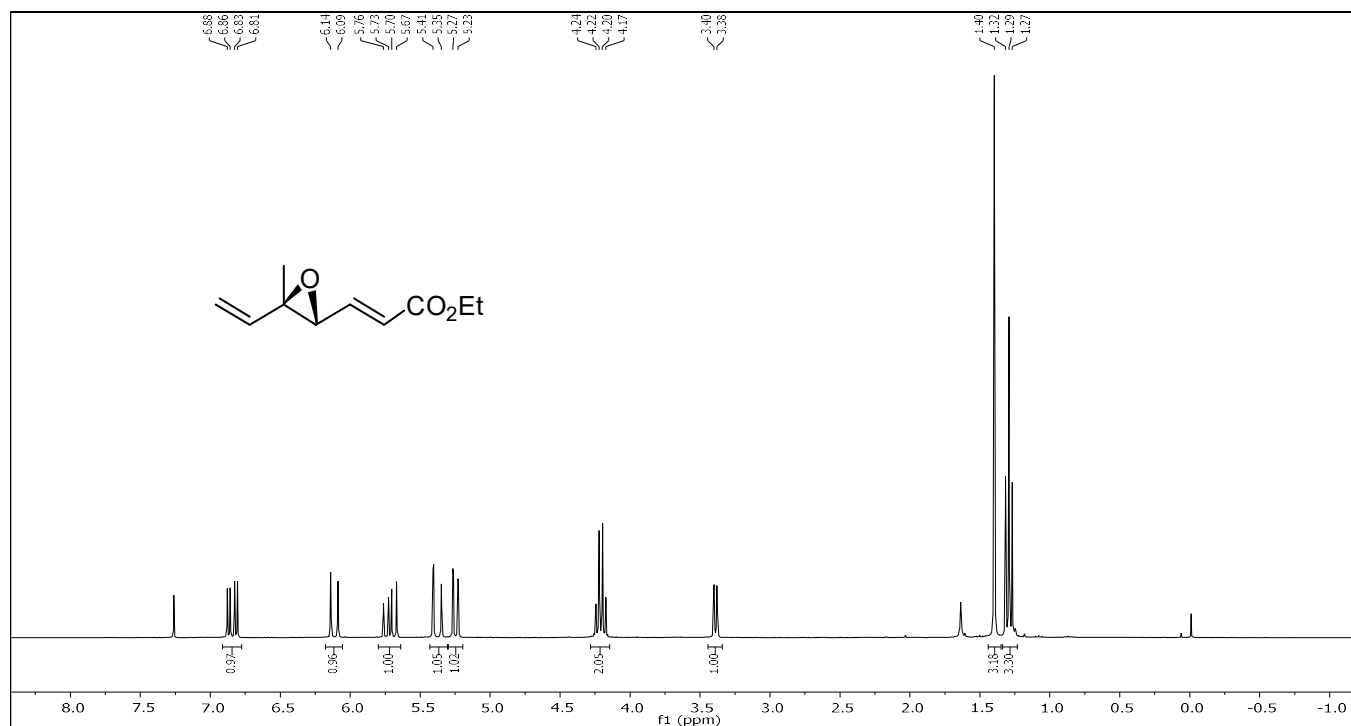

**<sup>13</sup>C-NMR spectrum of compound 11 (75 MHz, CDCl<sub>3</sub>):**

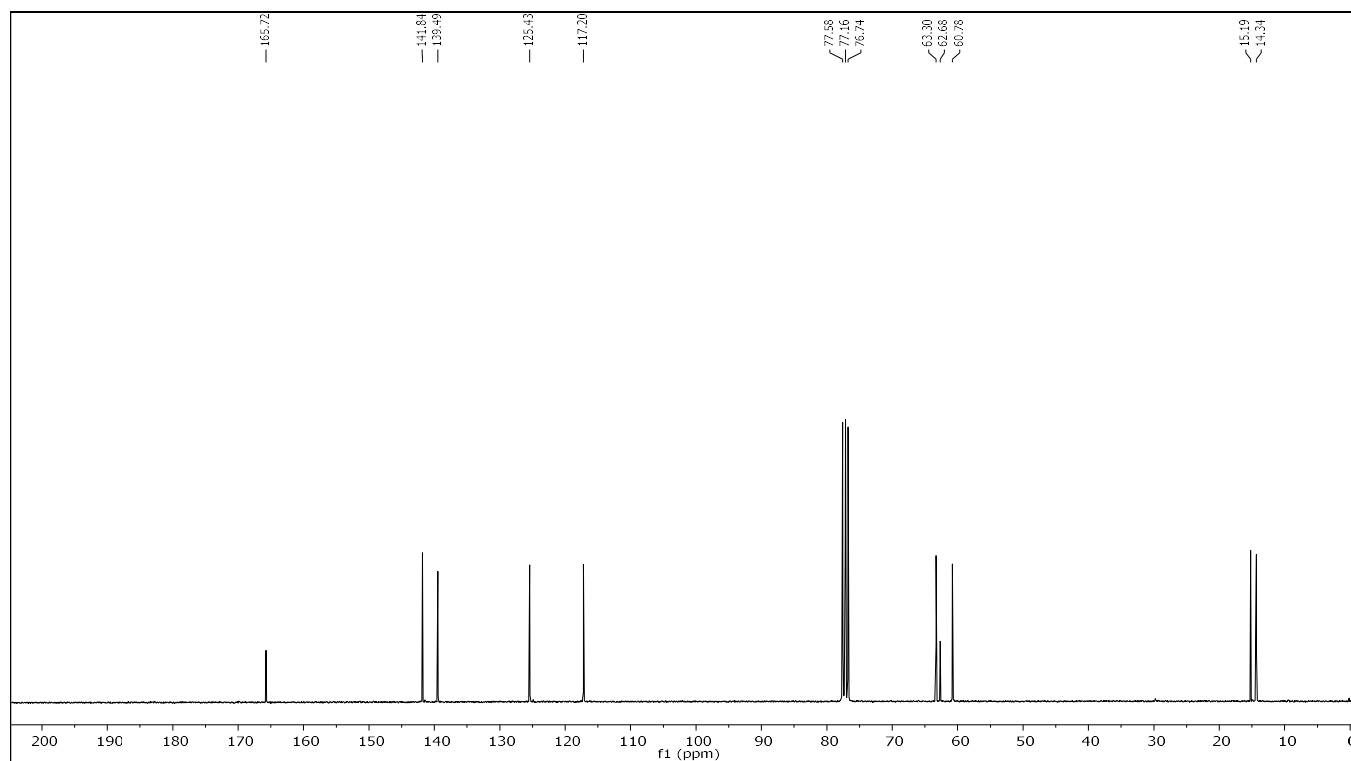

**<sup>1</sup>H-NMR spectrum of compound 15a/15b (300 MHz, CDCl<sub>3</sub>):**

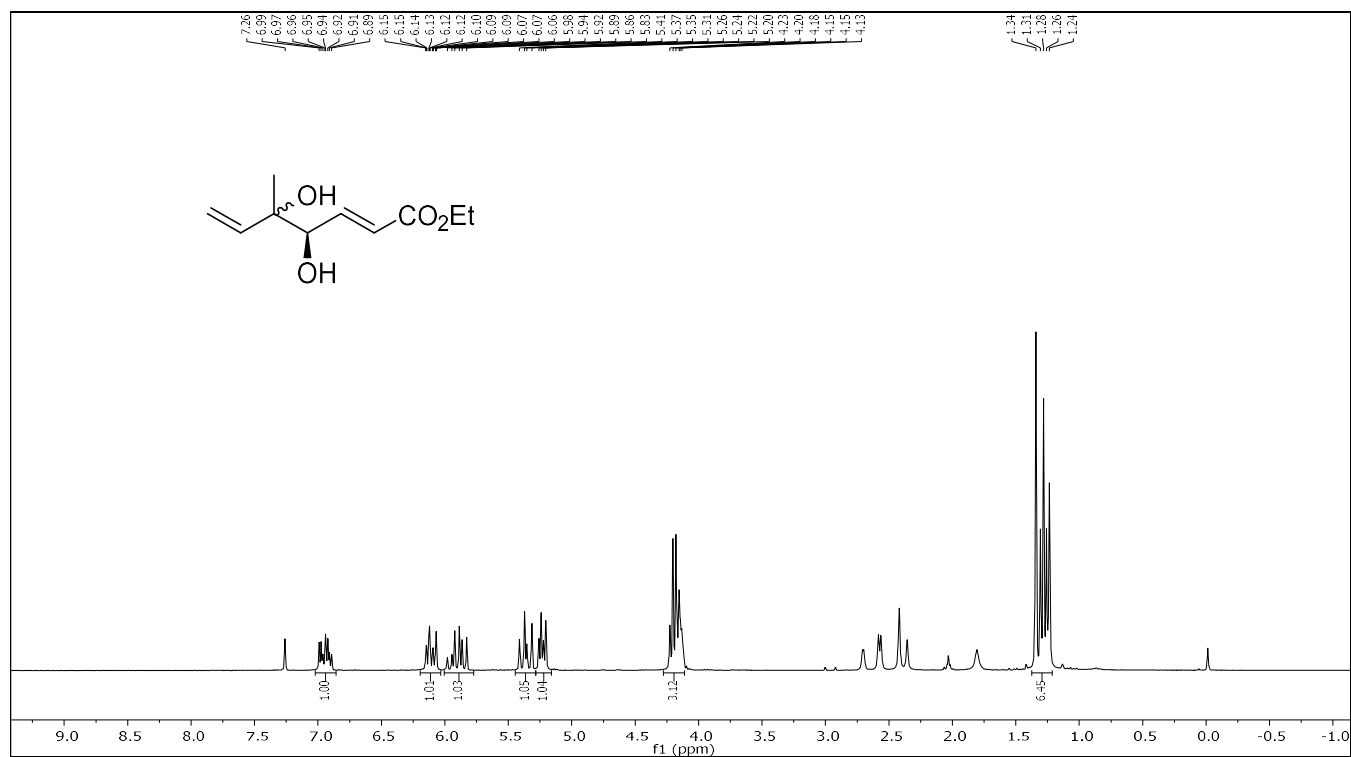

**<sup>13</sup>C-NMR spectrum of compound 15a/15b (75 MHz, CDCl<sub>3</sub>):**

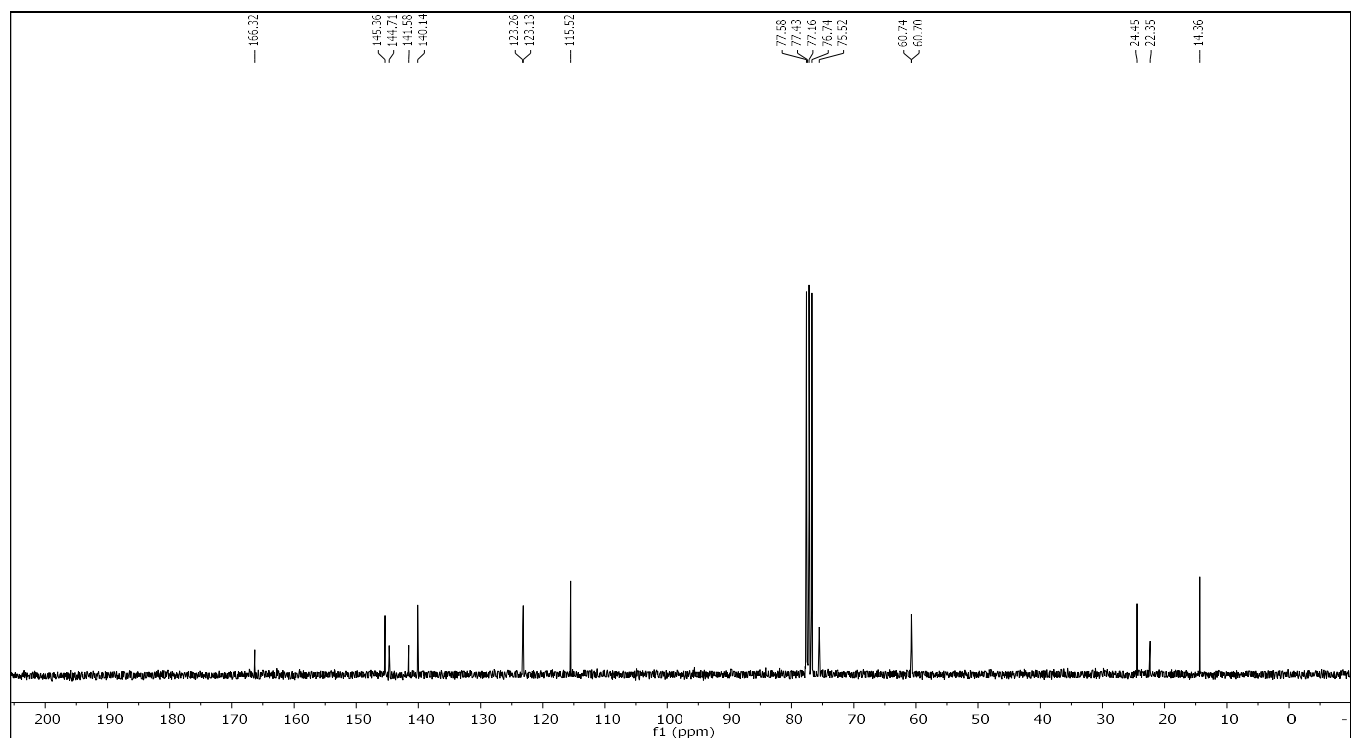

**<sup>1</sup>H-NMR spectrum of compound 16a (300 MHz, CDCl<sub>3</sub>):**

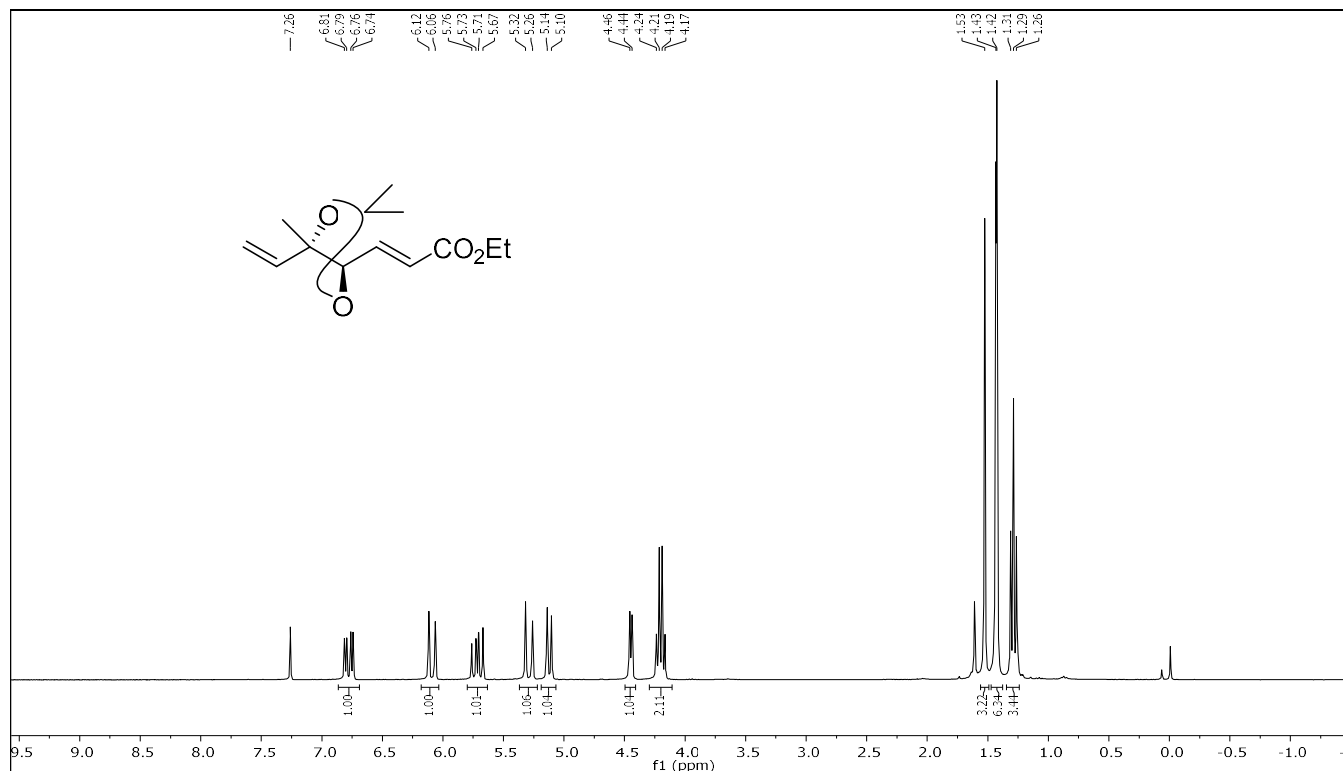

**<sup>13</sup>C-NMR spectrum of compound 16a (75 MHz, CDCl<sub>3</sub>):**

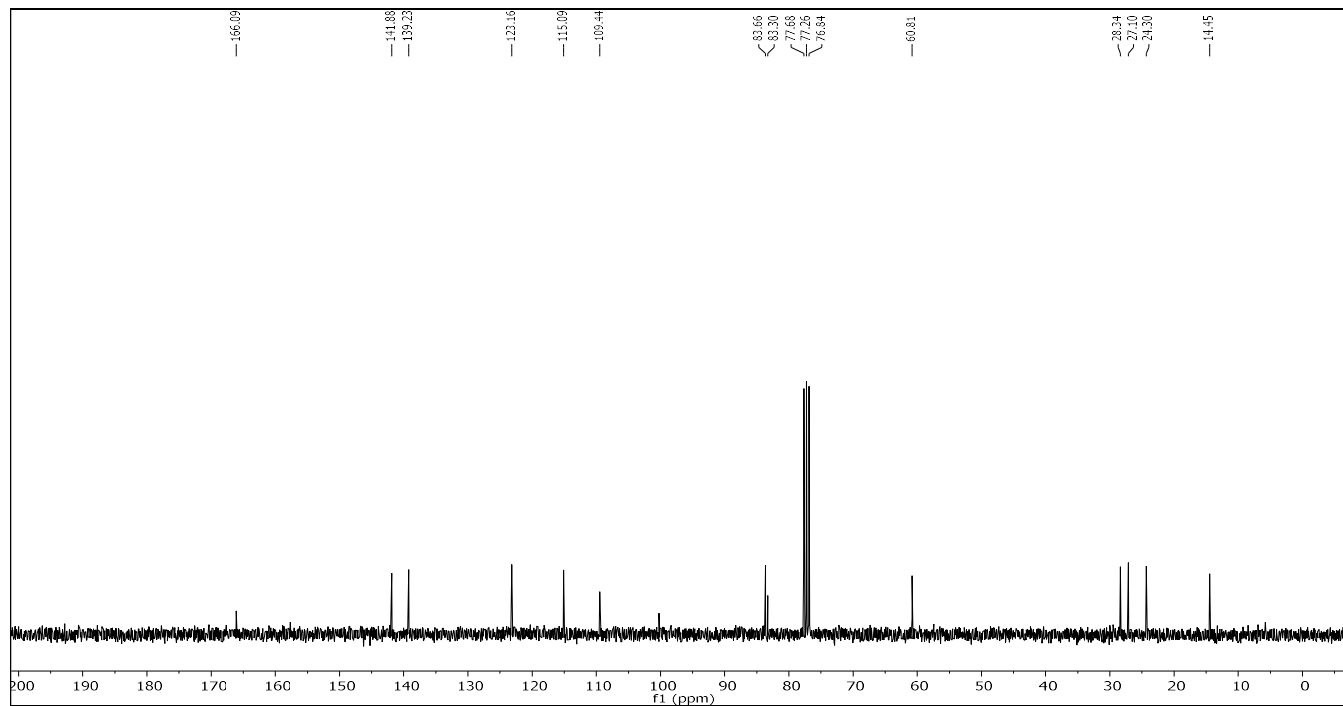

**<sup>1</sup>H-NMR spectrum of compound 16b (300 MHz, CDCl<sub>3</sub>):**

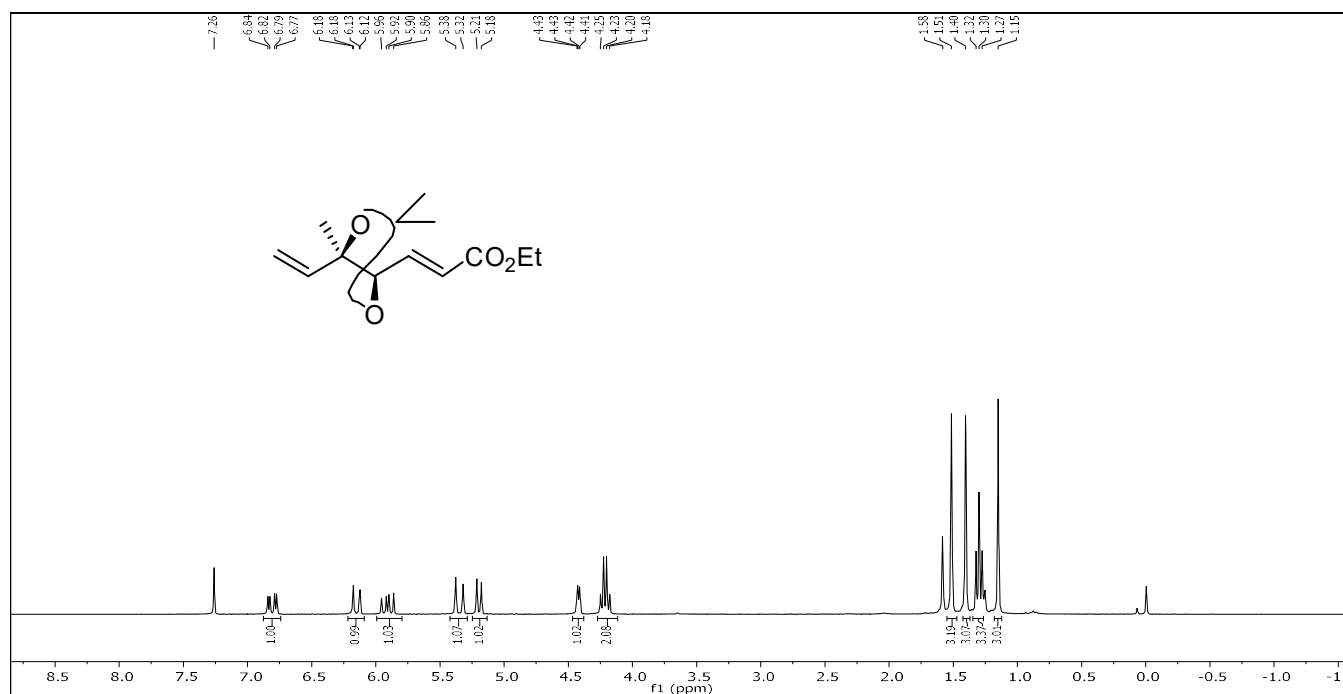

**<sup>13</sup>C-NMR spectrum of compound 16b (75 MHz, CDCl<sub>3</sub>):**

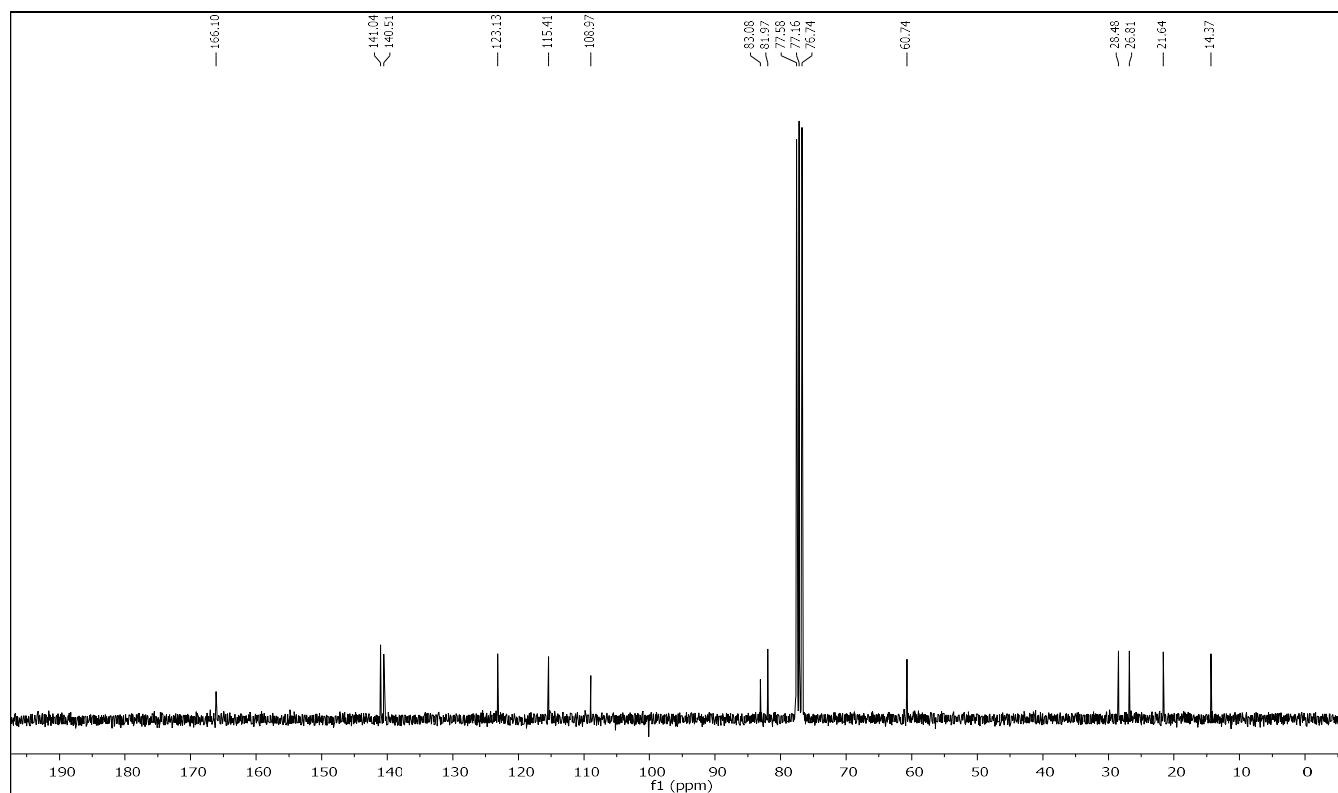



NOESY spectrum of compound 16a (300 MHz, CDCl<sub>3</sub>):

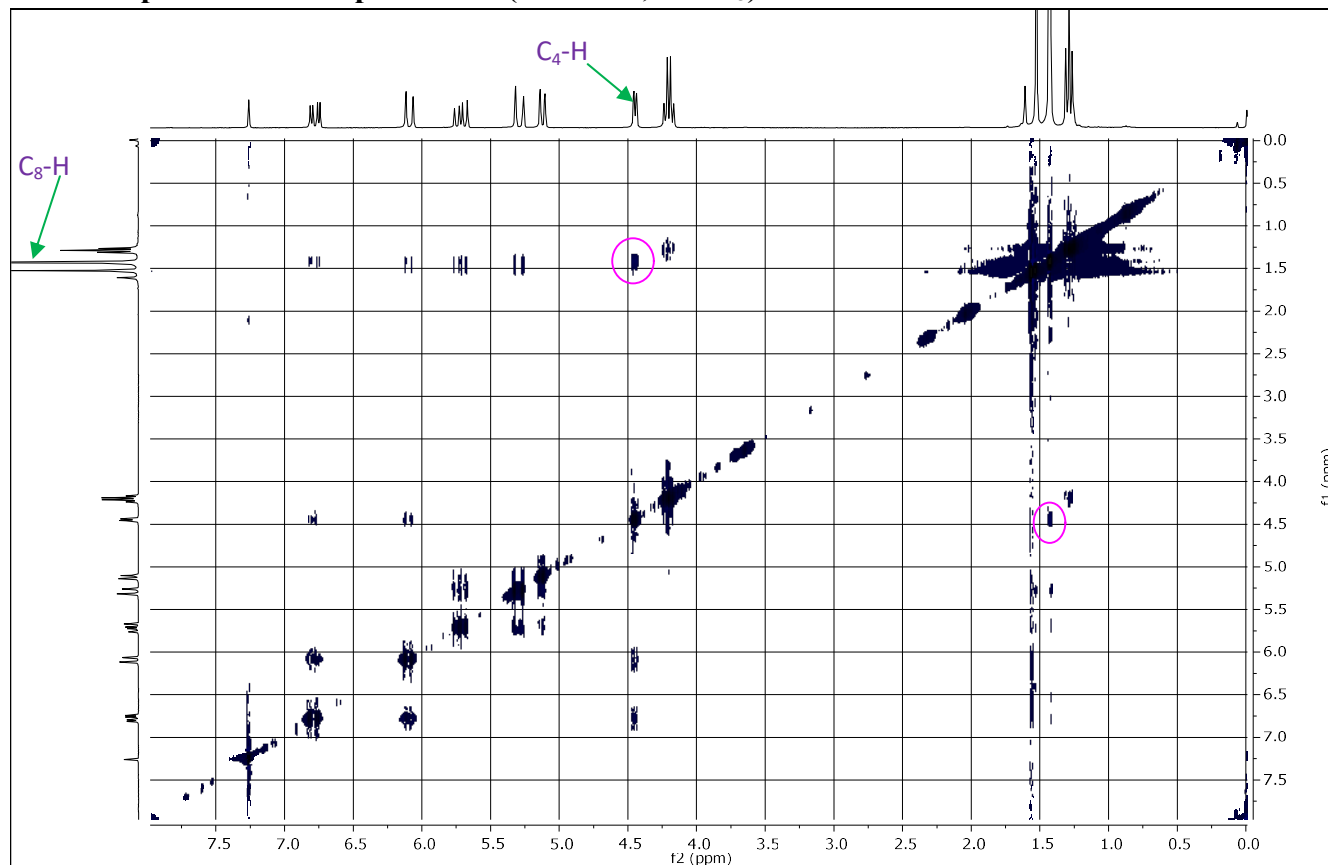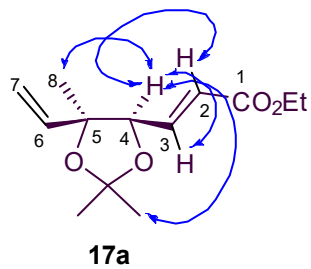

NOESY spectrum of compound 16b (300 MHz, CDCl<sub>3</sub>):

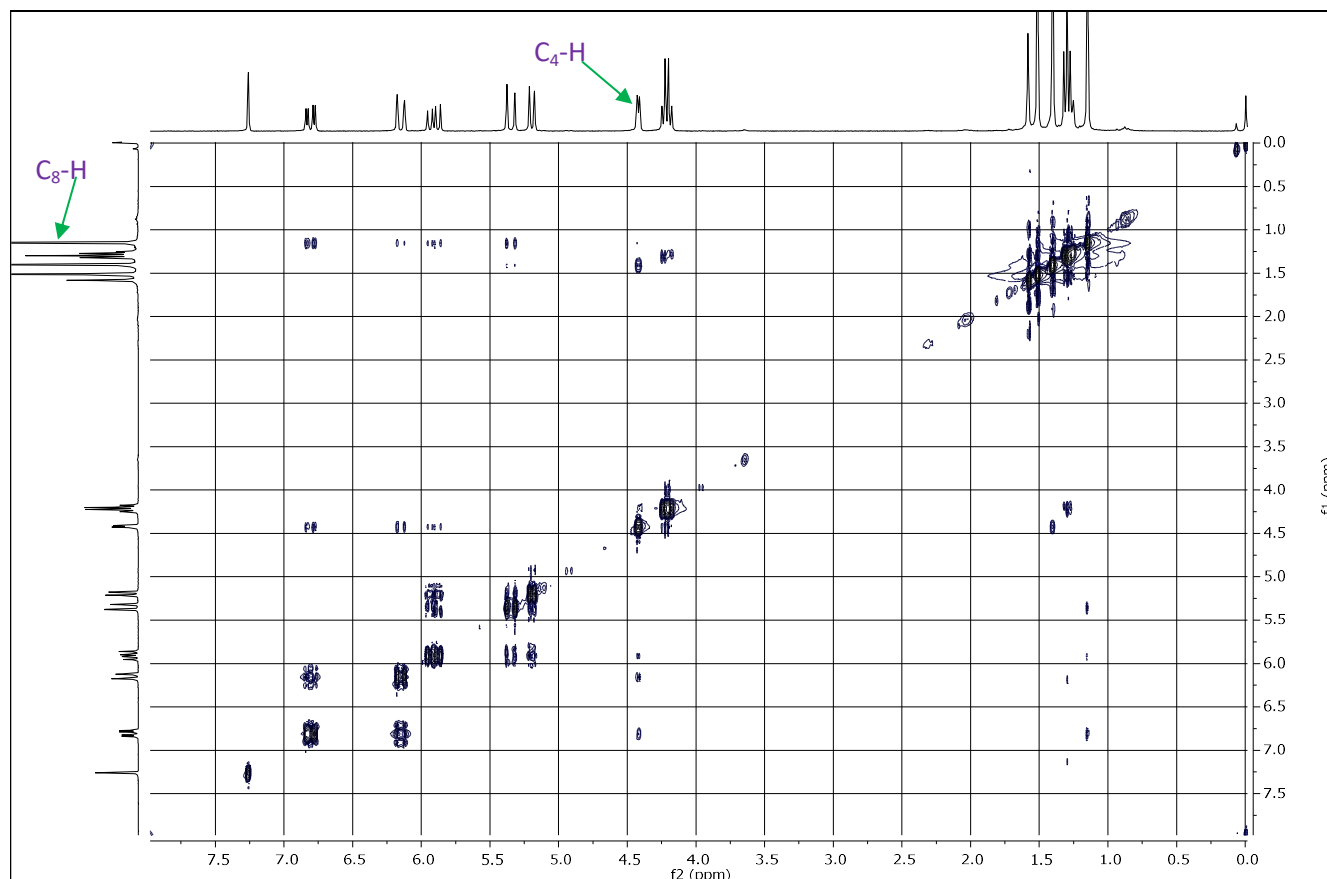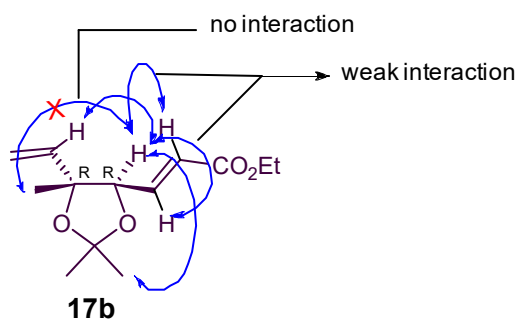

**<sup>1</sup>H-NMR spectrum of compound 17a (300 MHz, CDCl<sub>3</sub>):**

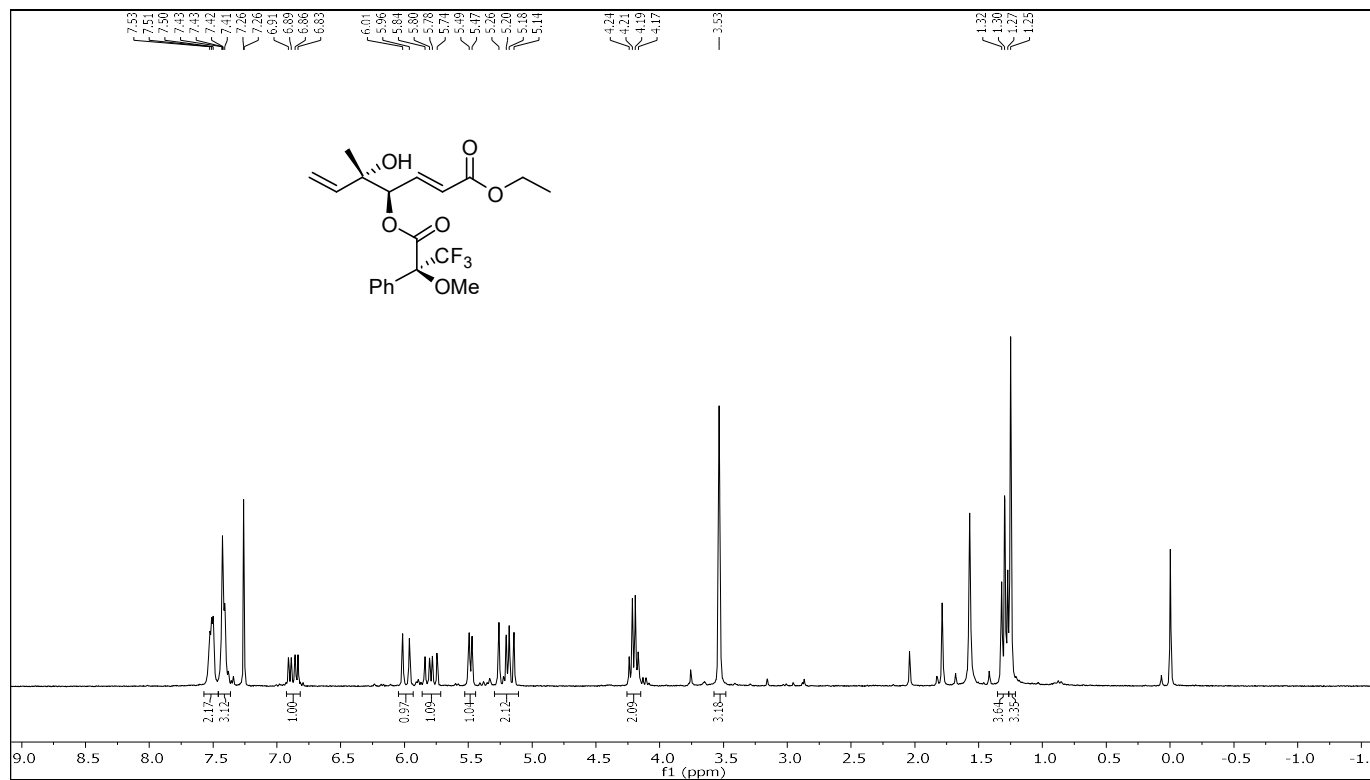

**<sup>13</sup>C-NMR spectrum of compound 17a (75 MHz, CDCl<sub>3</sub>):**

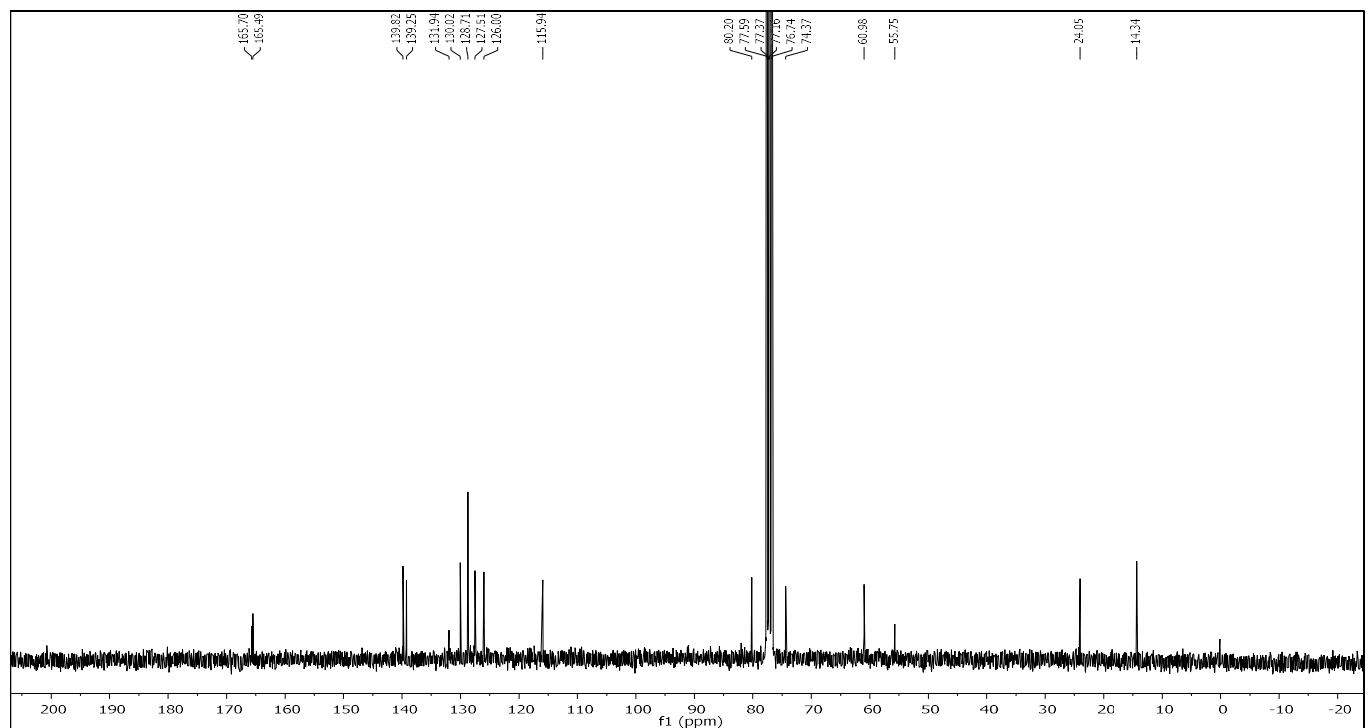

**<sup>1</sup>H-NMR spectrum of compound 17b (300 MHz, CDCl<sub>3</sub>):**

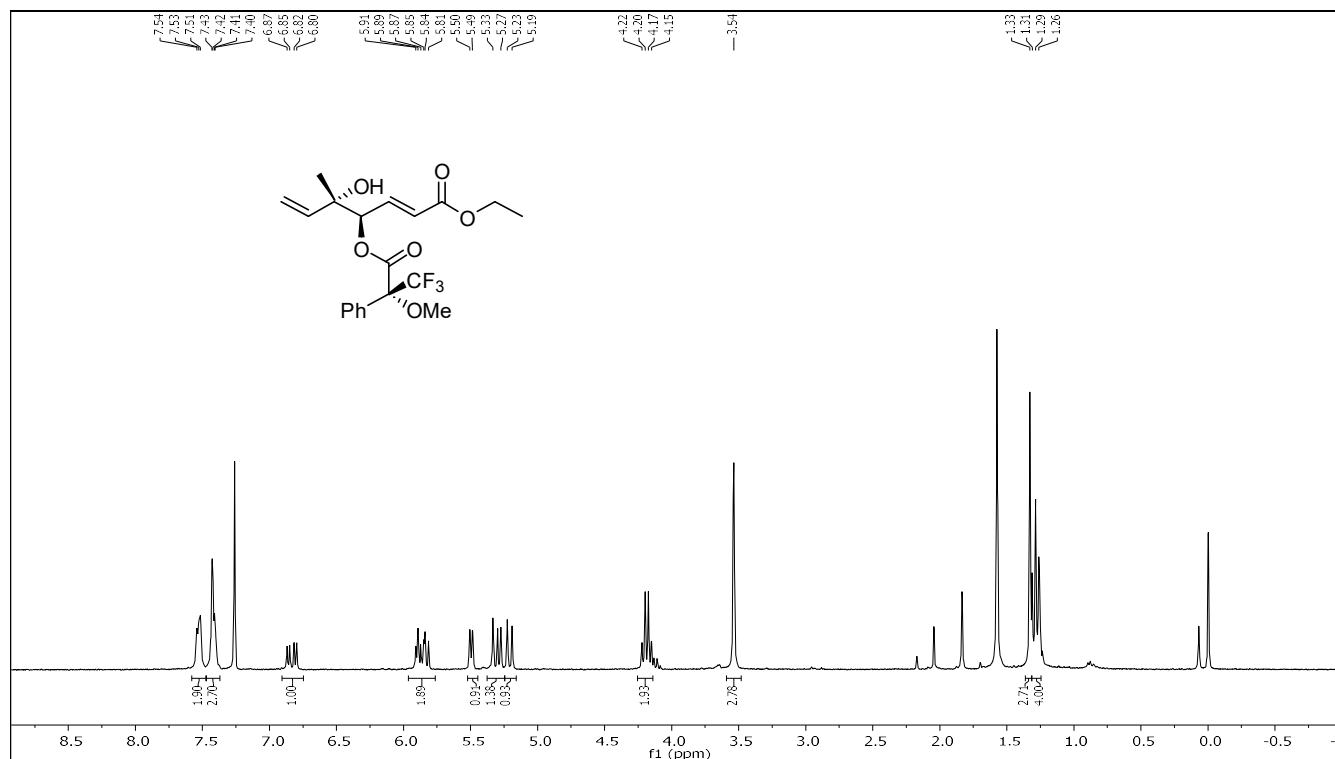

**<sup>13</sup>C-NMR spectrum of compound 17b (75 MHz, CDCl<sub>3</sub>):**

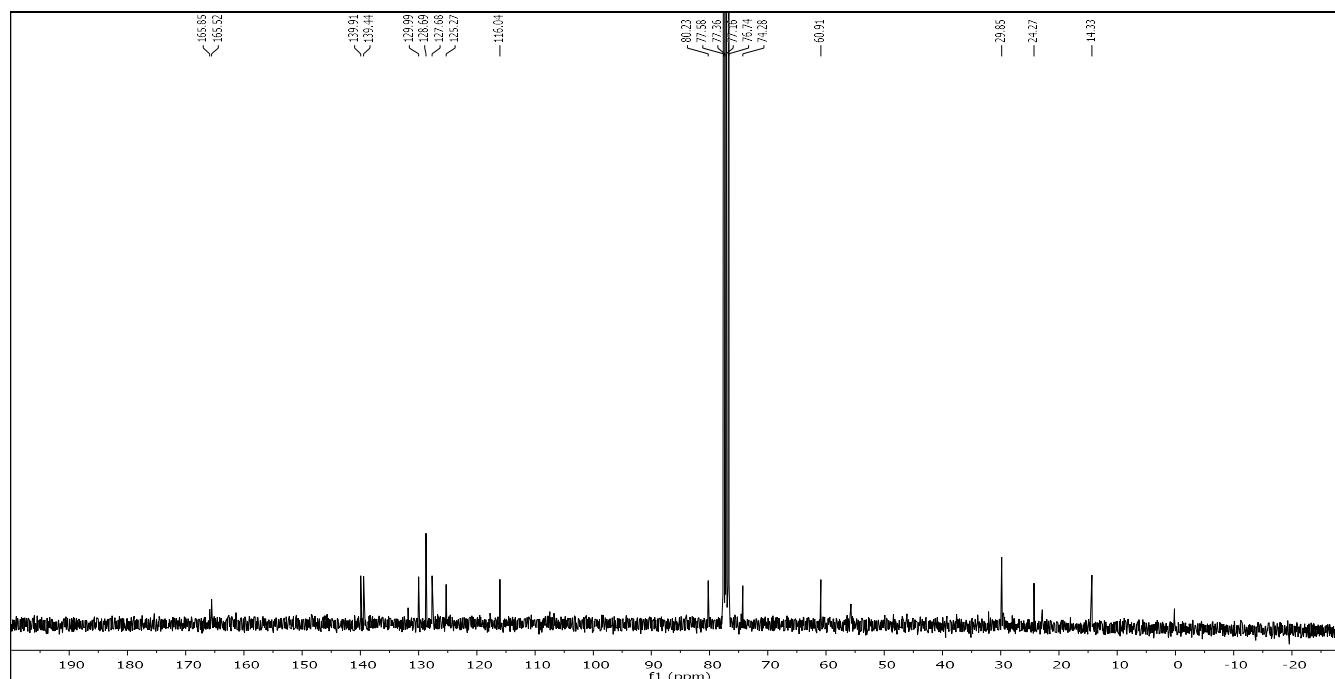

**<sup>1</sup>H-NMR spectrum of compound 18a (300 MHz, CDCl<sub>3</sub>):**

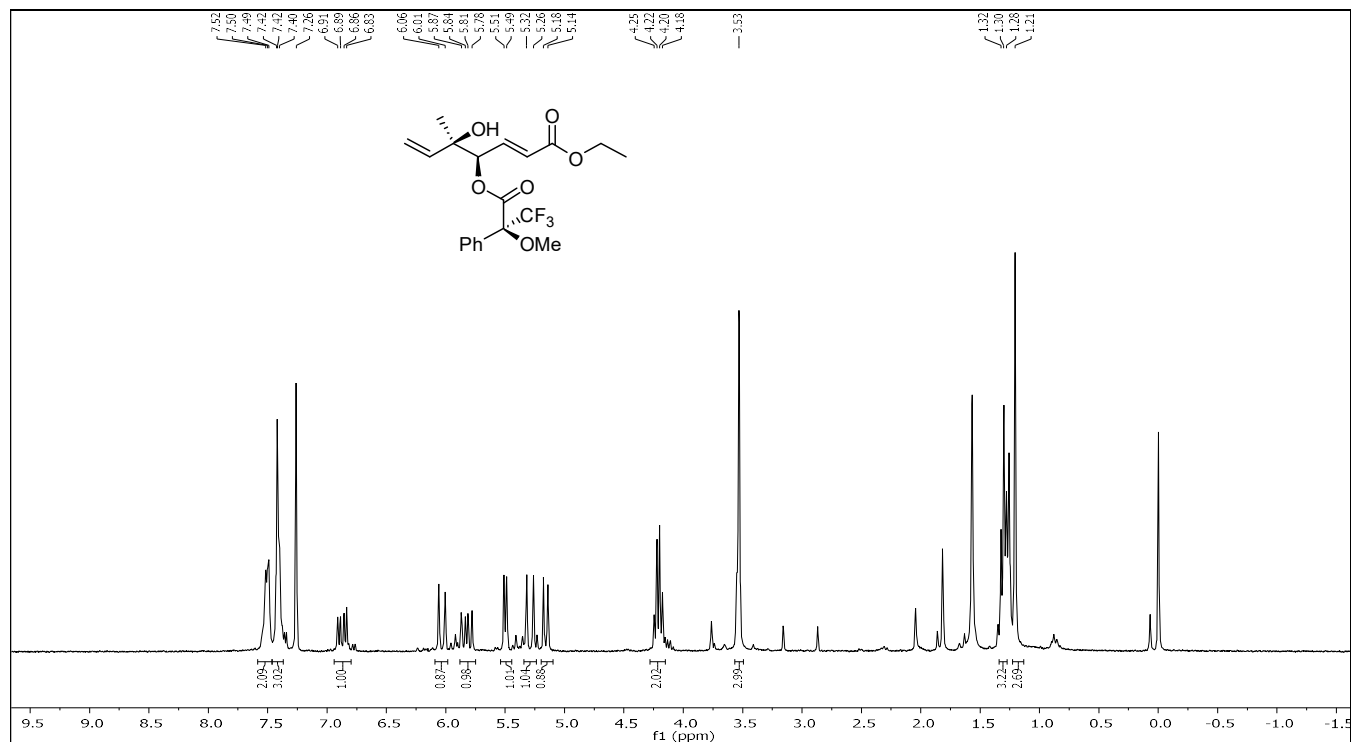

**<sup>13</sup>C-NMR spectrum of compound 18a (75 MHz, CDCl<sub>3</sub>):**

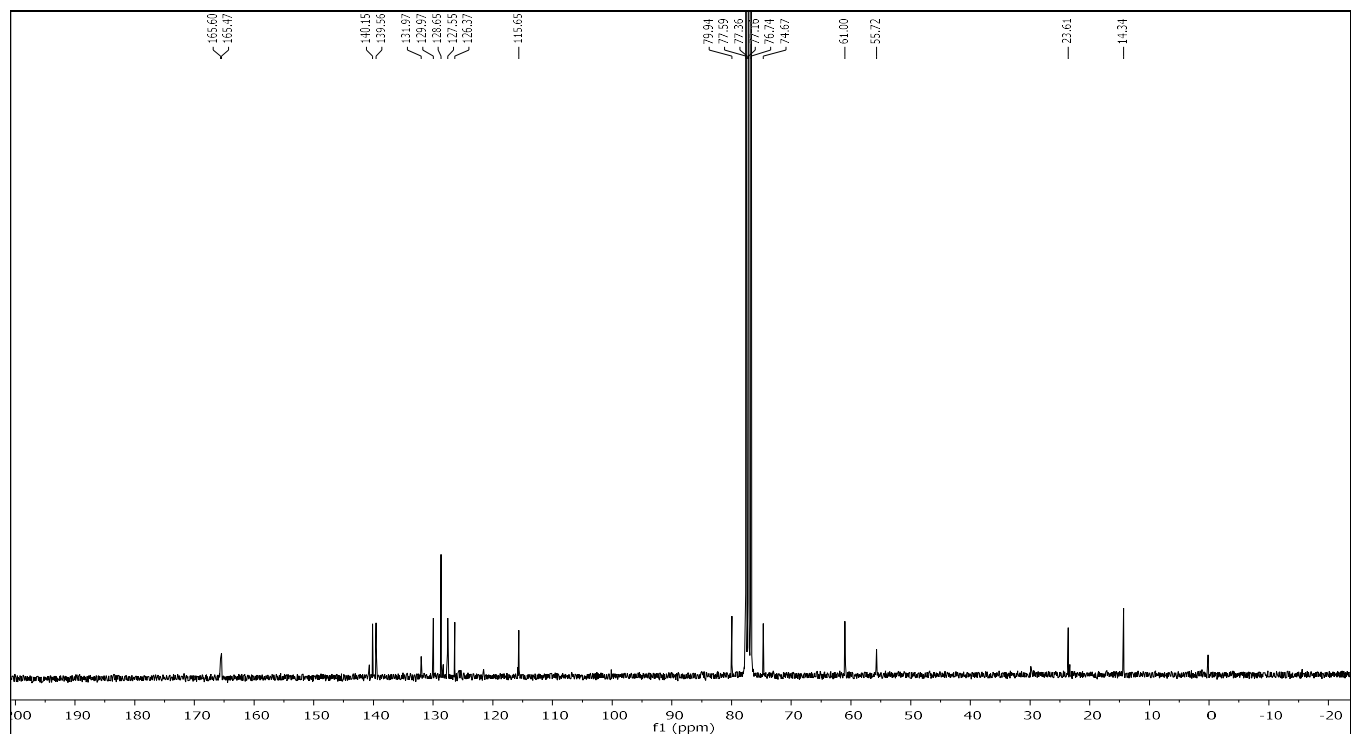

**<sup>1</sup>H-NMR spectrum of compound 18b (300 MHz, CDCl<sub>3</sub>):**

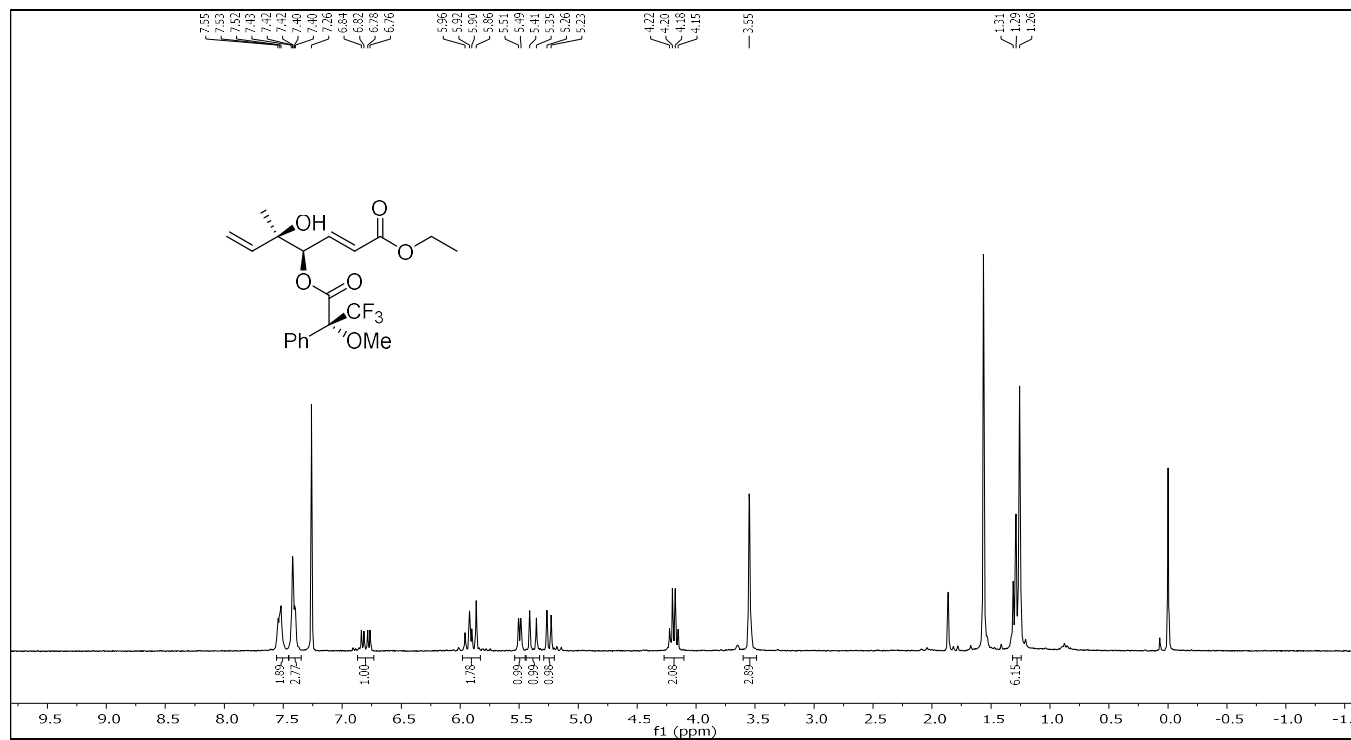

**<sup>13</sup>C-NMR spectrum of compound 18b (75 MHz, CDCl<sub>3</sub>):**

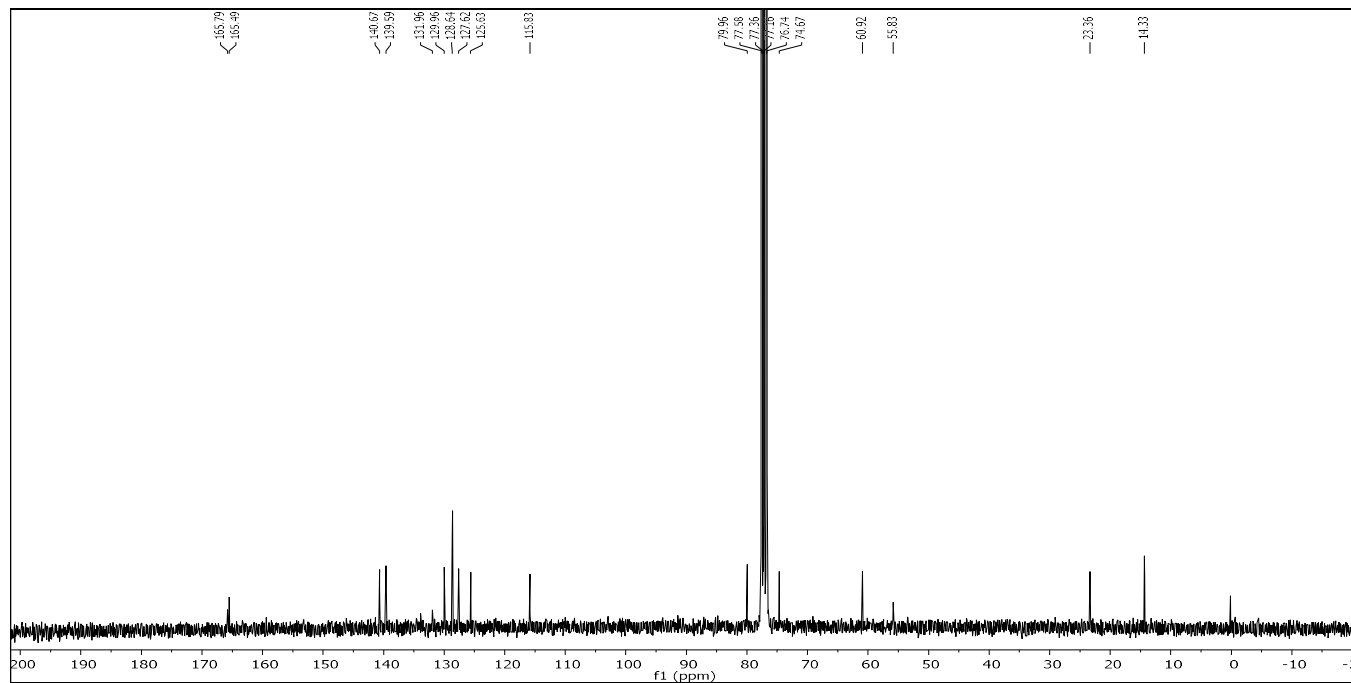

**<sup>1</sup>H-NMR spectrum of di-TBS ester (300 MHz, CDCl<sub>3</sub>):**

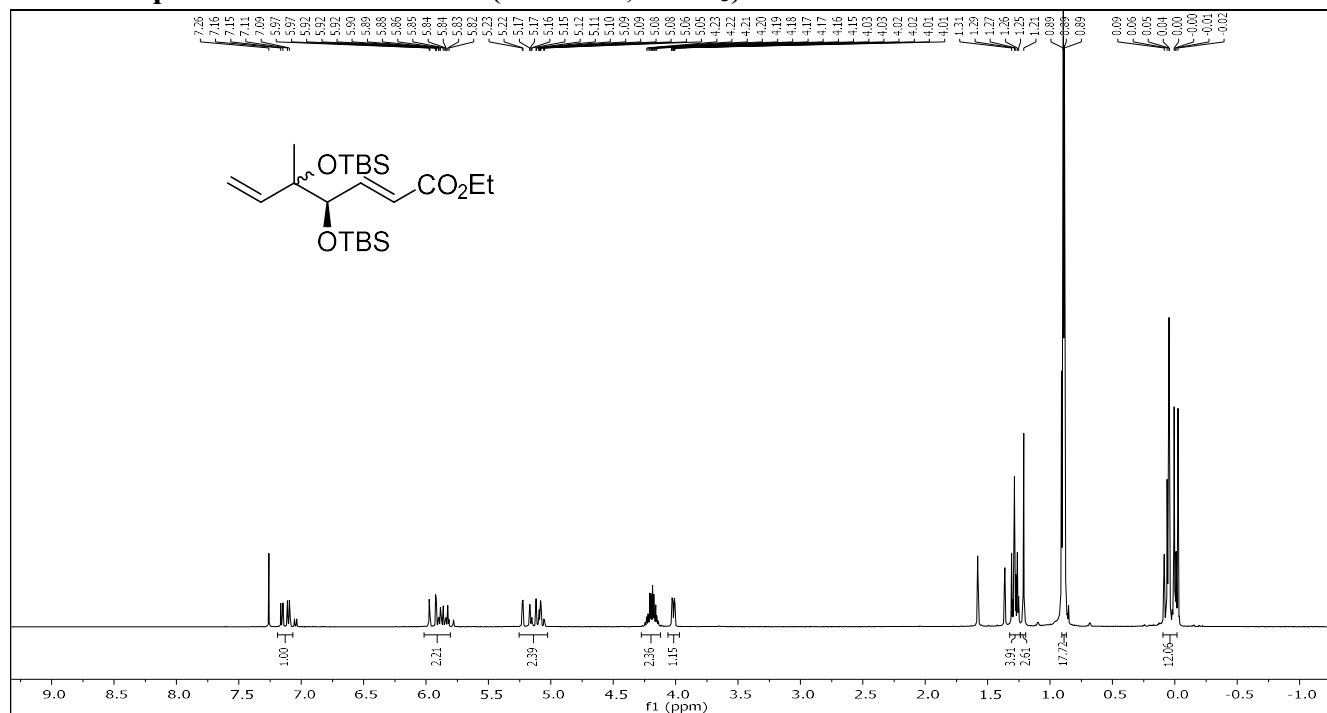

**<sup>13</sup>C-NMR spectrum of di-TBS ester (75 MHz, CDCl<sub>3</sub>):**

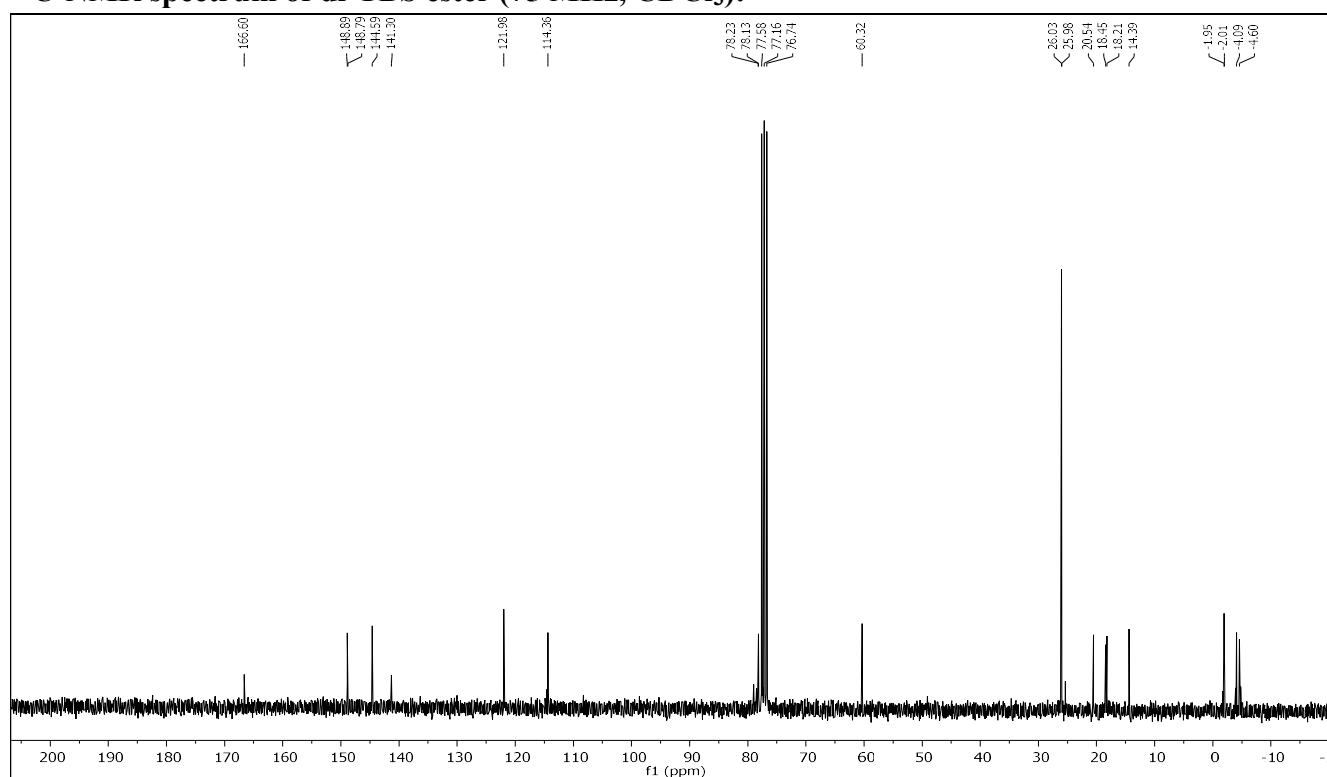

**<sup>1</sup>H-NMR spectrum of di-TBS alcohol (300 MHz, CDCl<sub>3</sub>):**

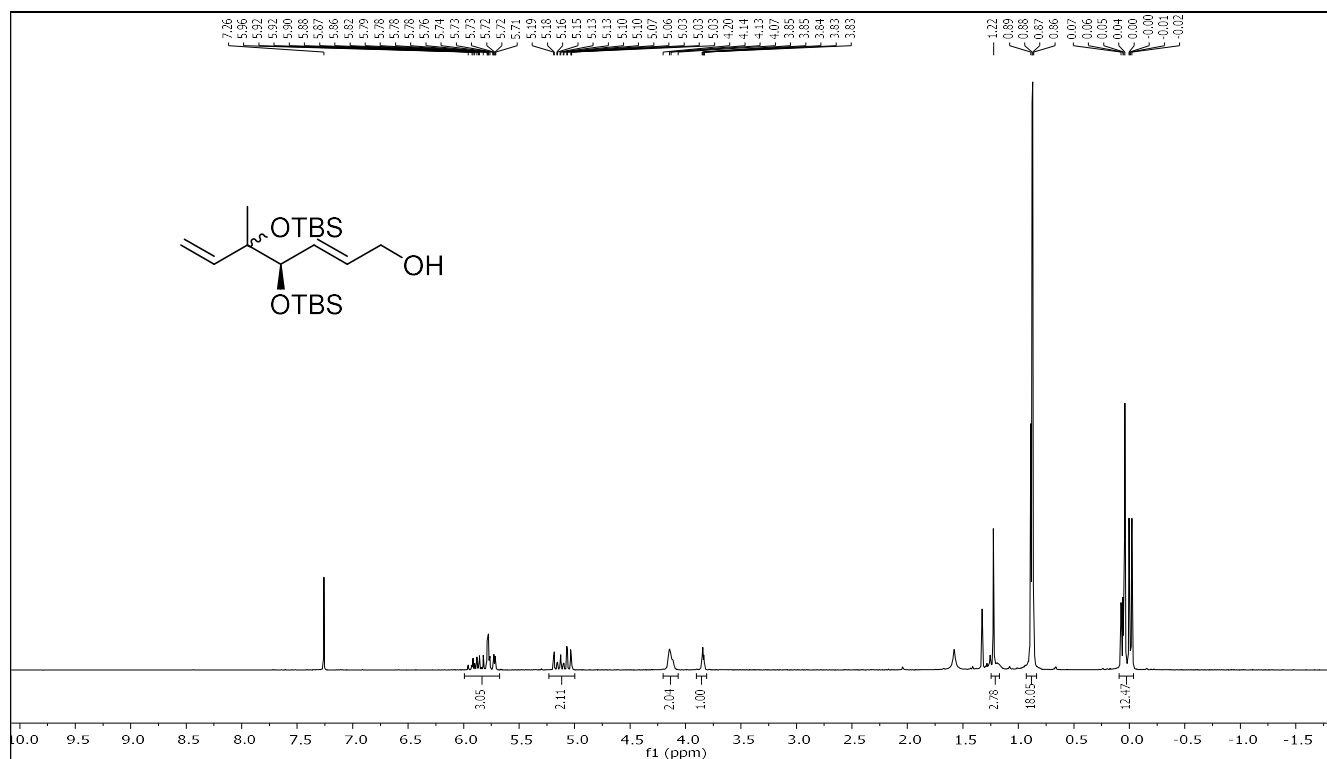

**<sup>13</sup>C-NMR spectrum of di-TBS alcohol (75 MHz, CDCl<sub>3</sub>):**

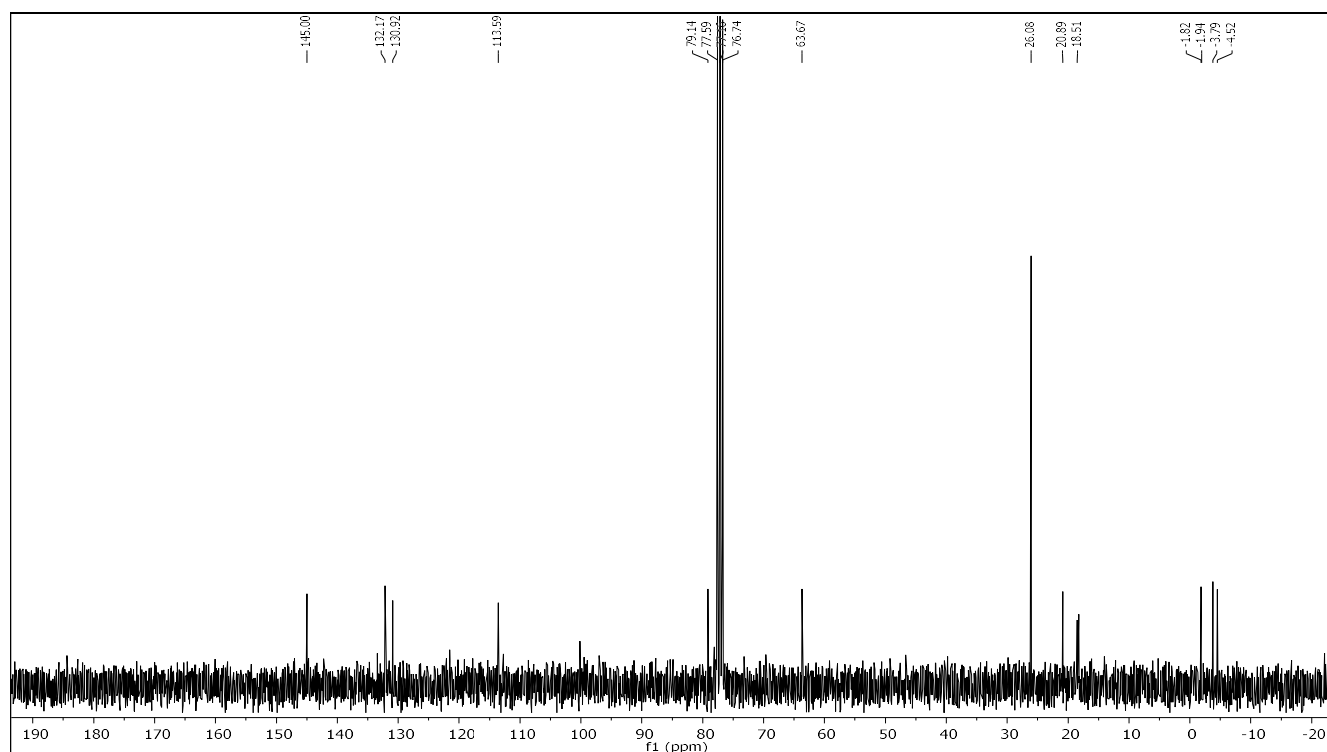



**<sup>1</sup>H-NMR spectrum of compound 19a/19b (300 MHz, CDCl<sub>3</sub>):**

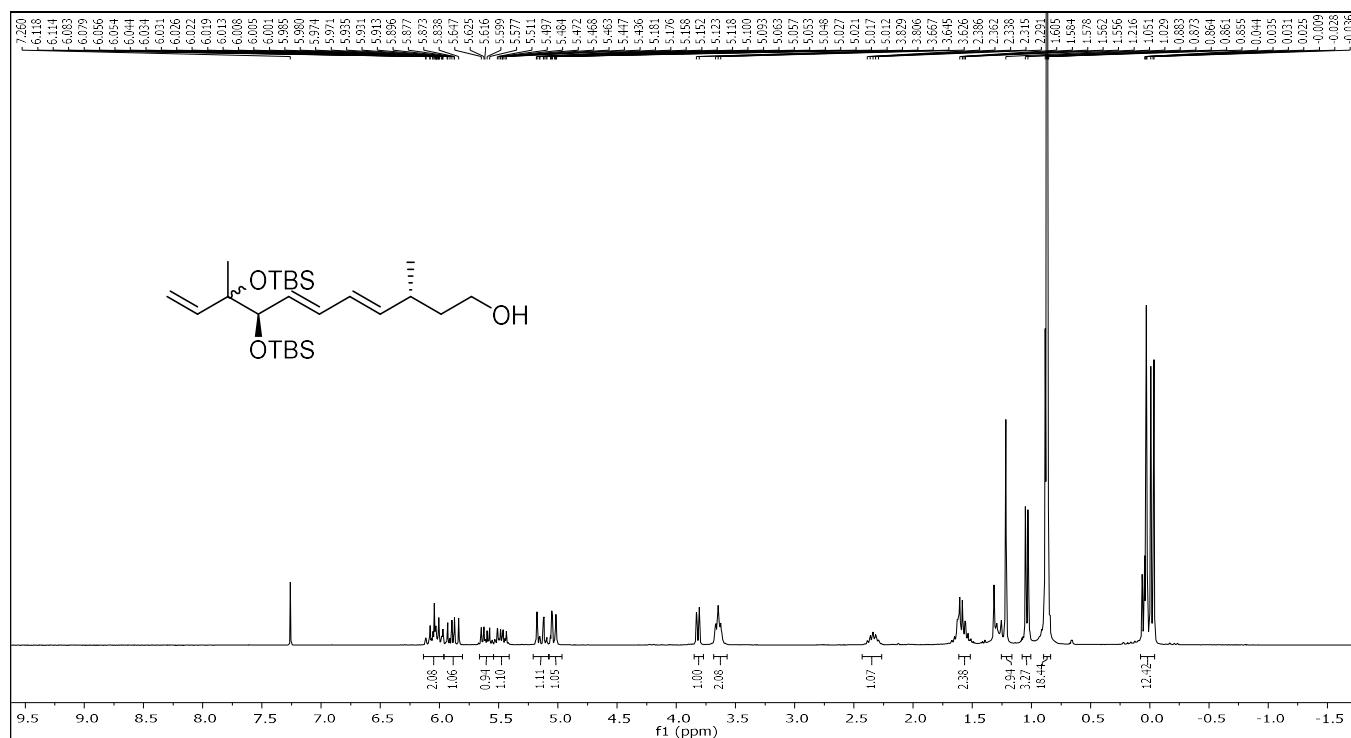

**<sup>13</sup>C-NMR spectrum of compound 19a/19b (75 MHz, CDCl<sub>3</sub>):**

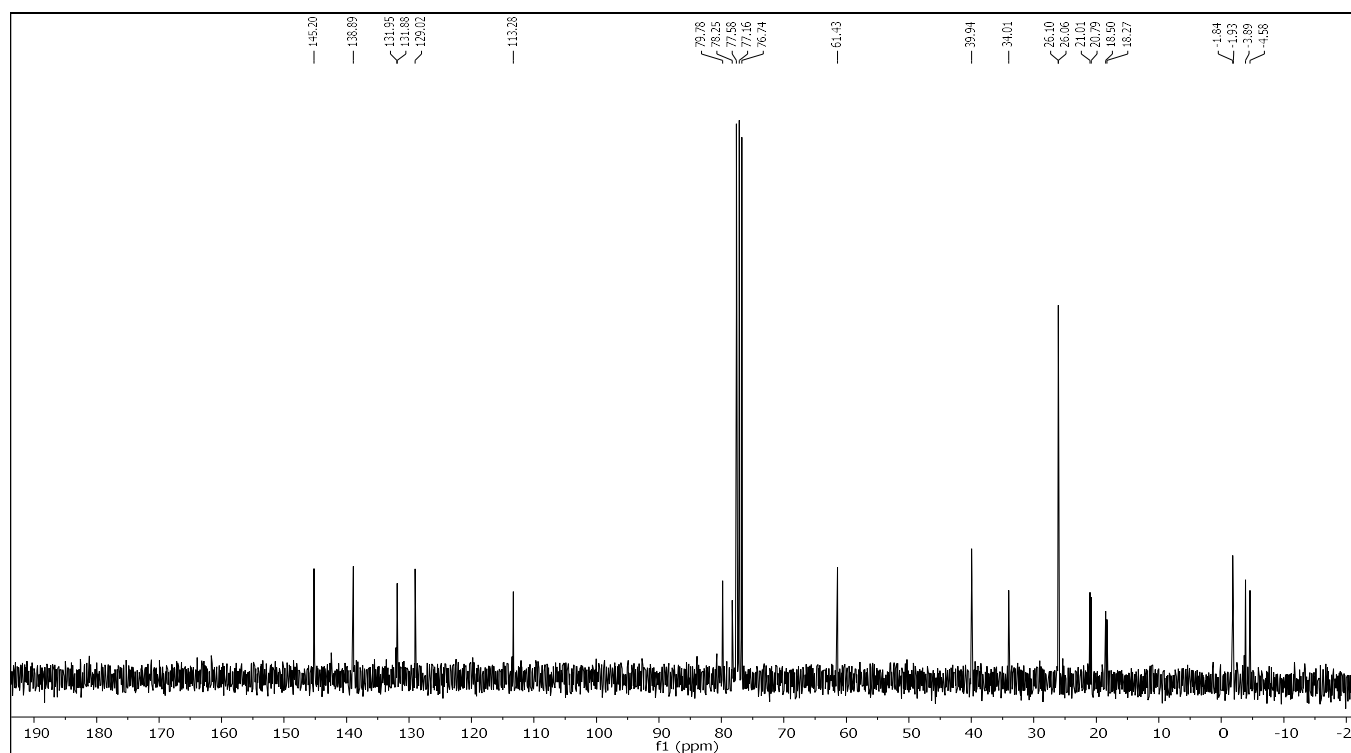

**<sup>1</sup>H-NMR spectrum of compound 20a/20b (300 MHz, CDCl<sub>3</sub>):**

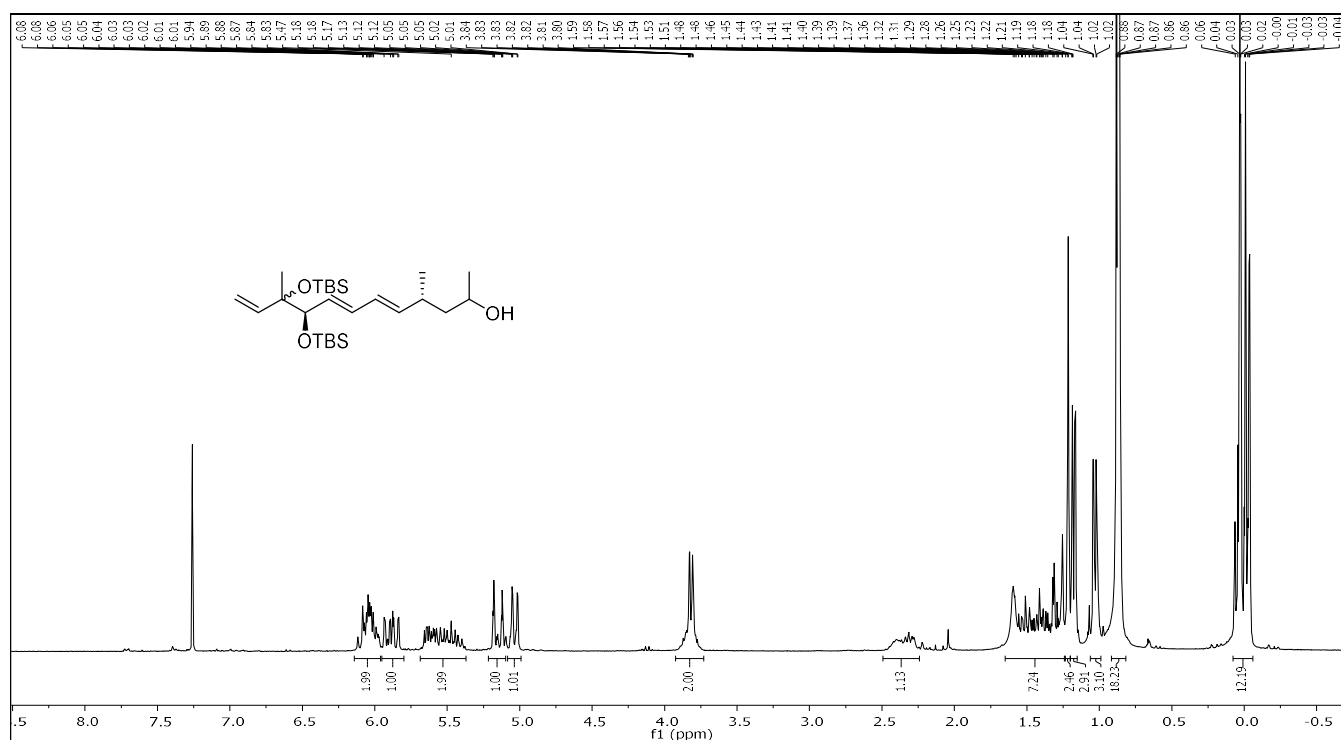

**<sup>13</sup>C-NMR spectrum of compound 20a/20b (75 MHz, CDCl<sub>3</sub>):**

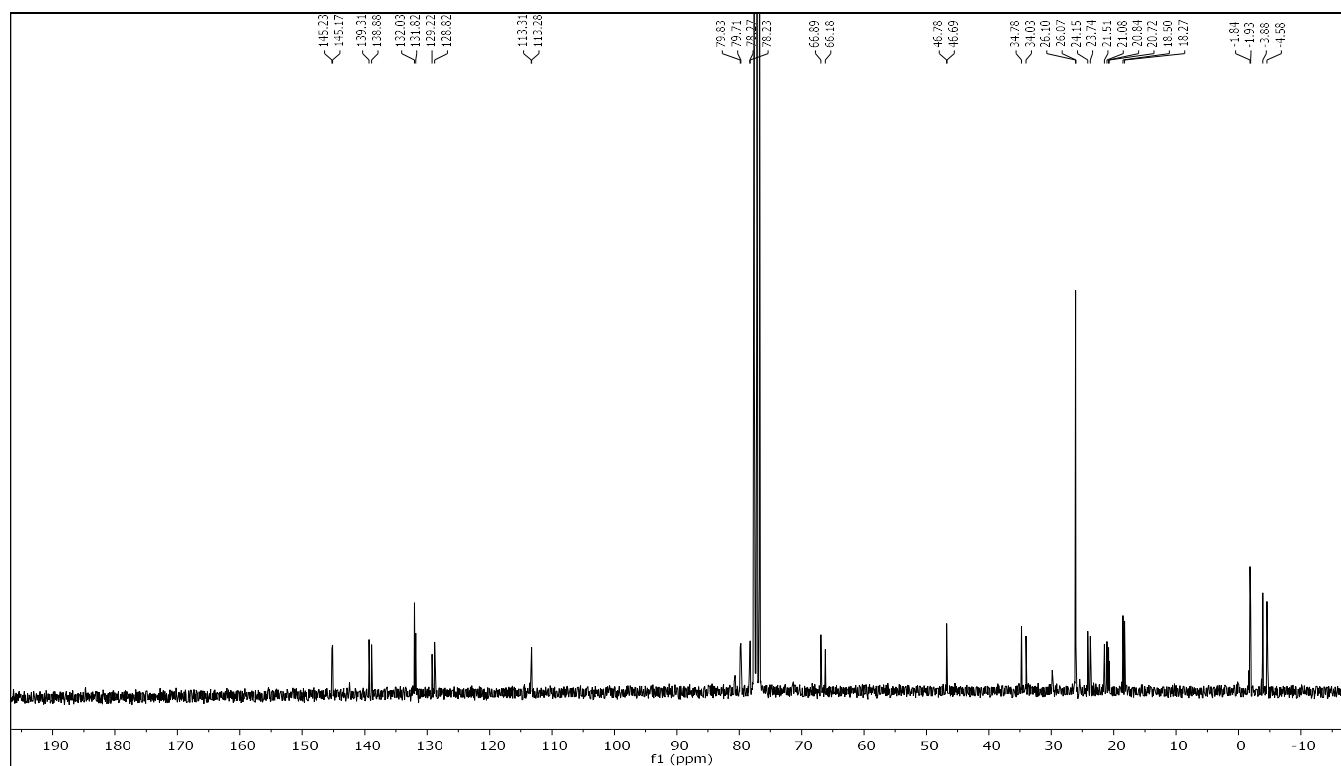

**<sup>1</sup>H-NMR spectrum of compound 21a/21b (300 MHz, CDCl<sub>3</sub>):**

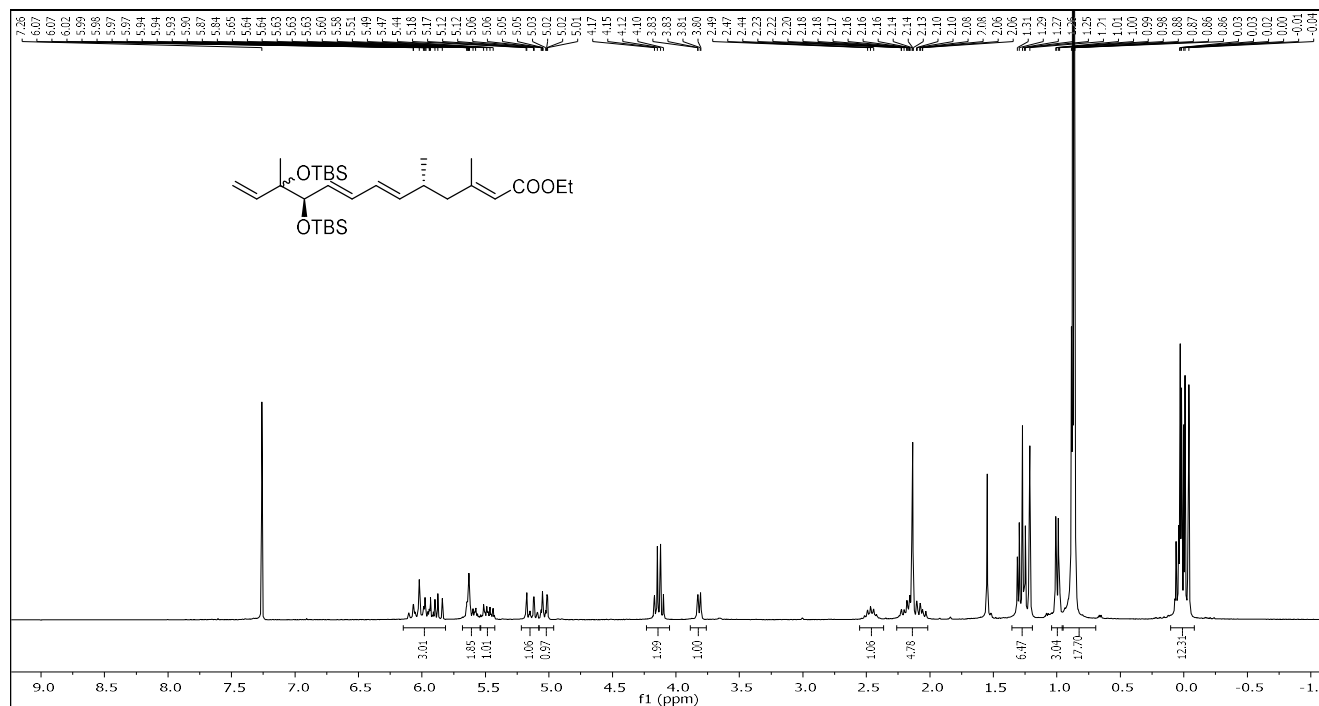

**<sup>13</sup>C-NMR spectrum of compound 21a/21b (75 MHz, CDCl<sub>3</sub>):**

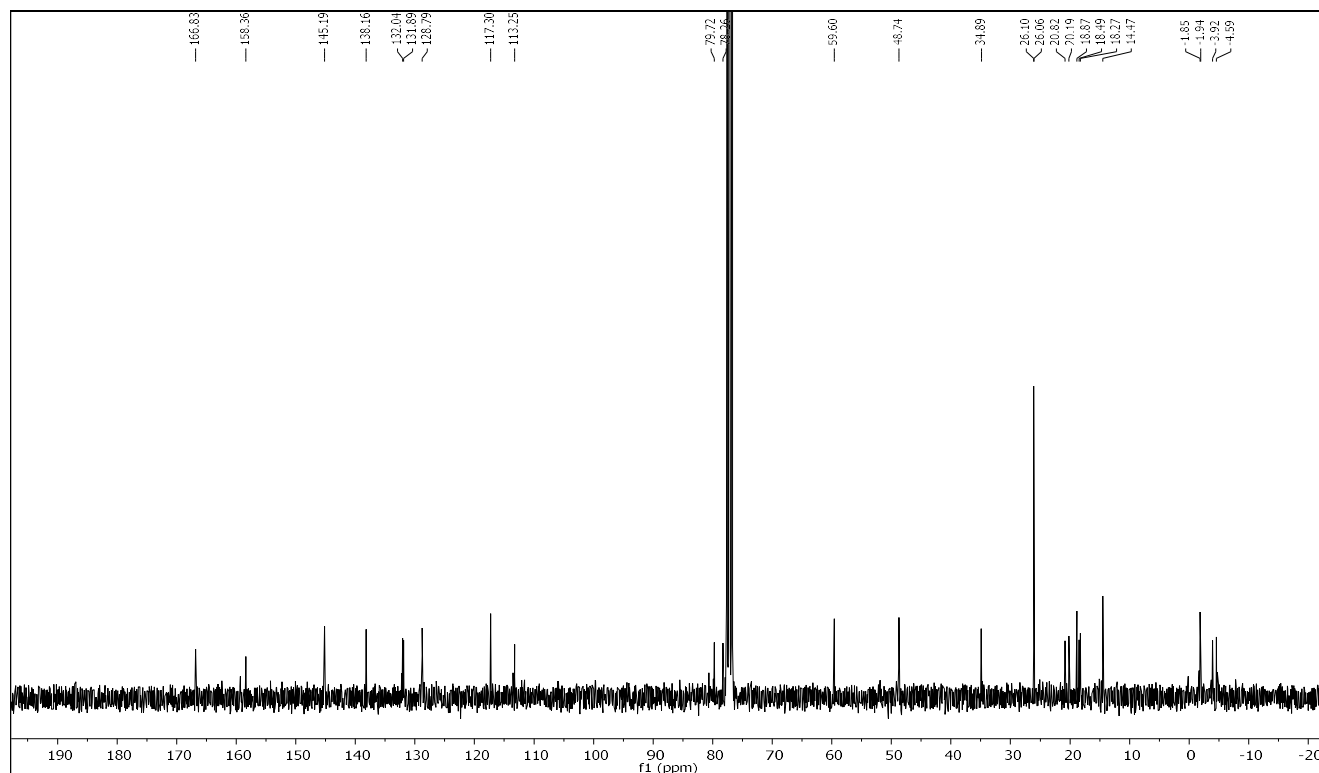

**<sup>1</sup>H-NMR spectrum of compound 22a/22b (300 MHz, CDCl<sub>3</sub>):**

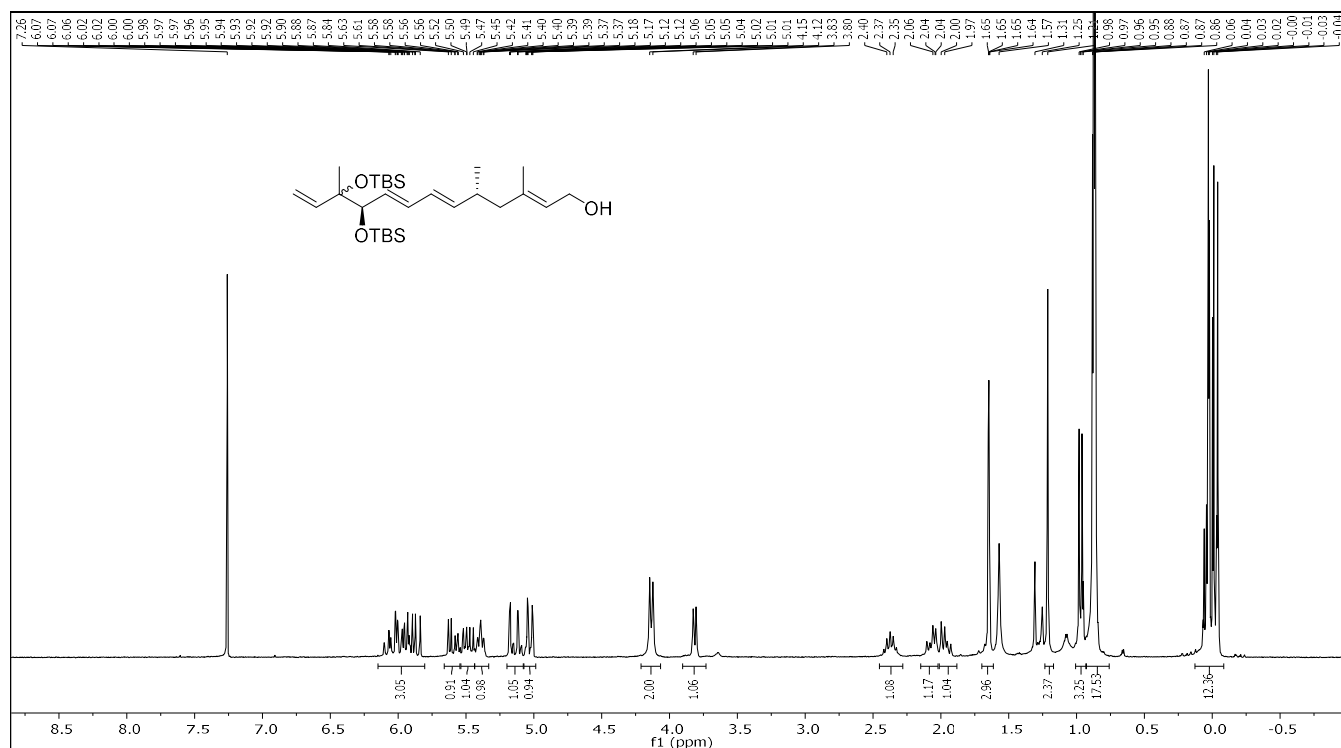

**<sup>13</sup>C-NMR spectrum of compound 22a/22b (75 MHz, CDCl<sub>3</sub>):**

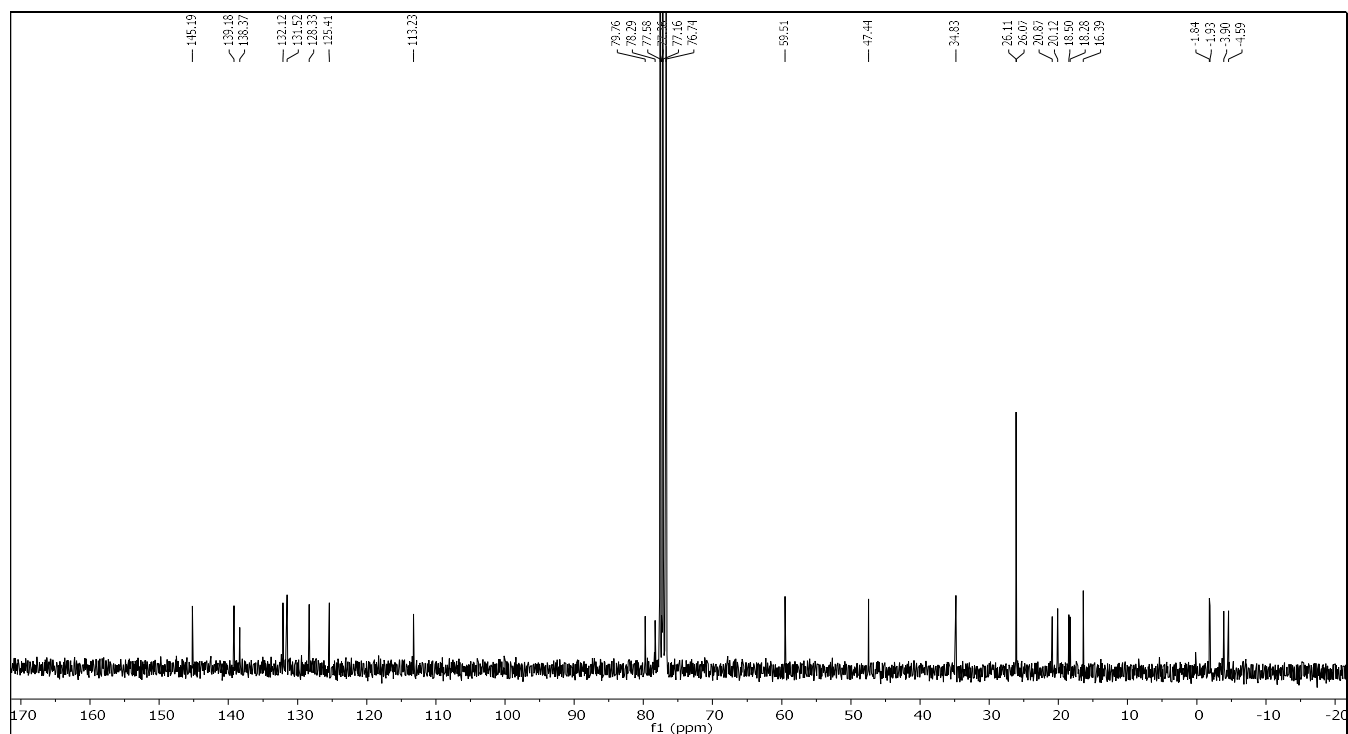

NOESY - spectrum of compound 22a/22b (300 MHz, CDCl<sub>3</sub>):

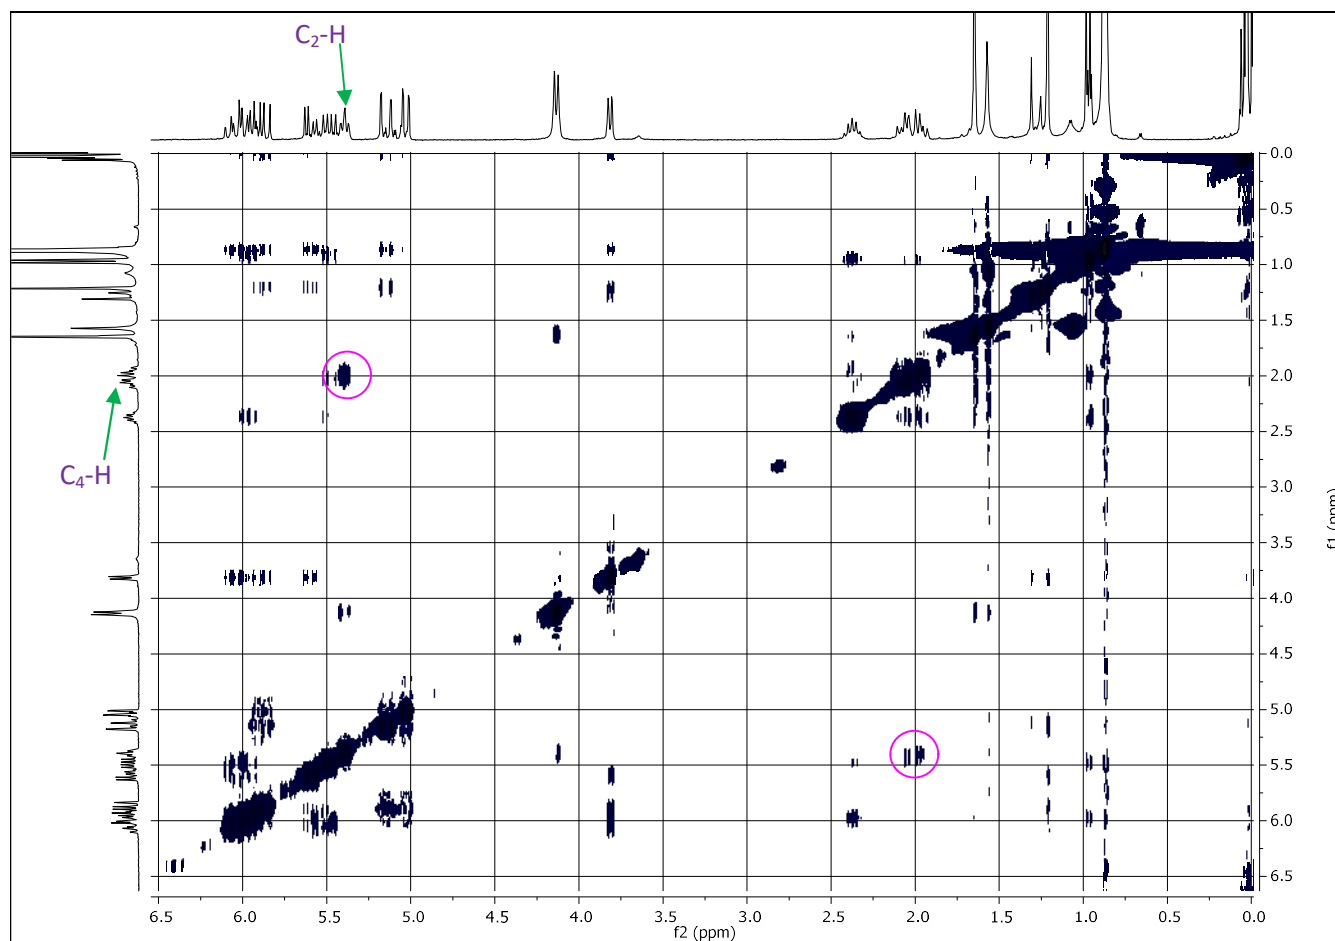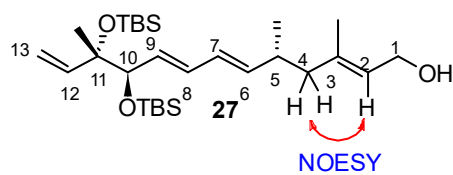

**<sup>1</sup>H-NMR spectrum of compound 23a/23b (300 MHz, CDCl<sub>3</sub>):**

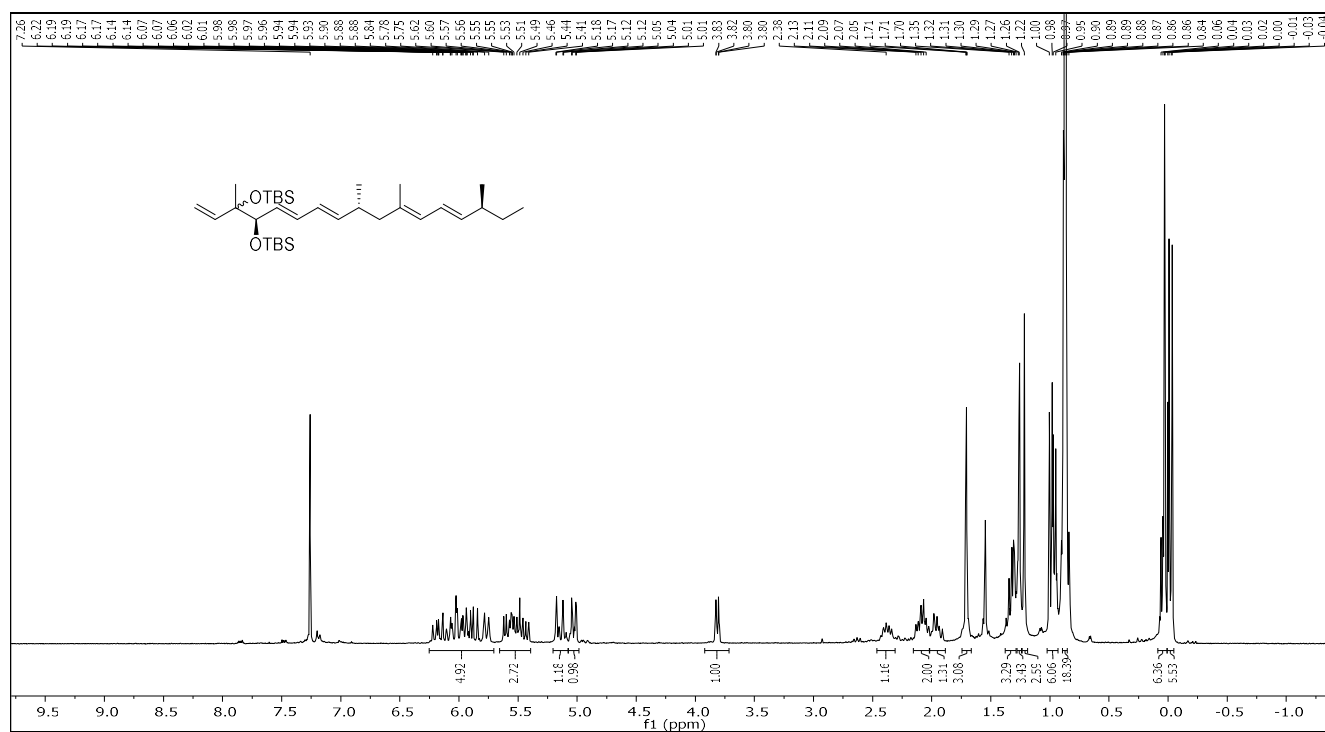

**<sup>13</sup>C-NMR spectrum of compound 23a/23b (75 MHz, CDCl<sub>3</sub>):**

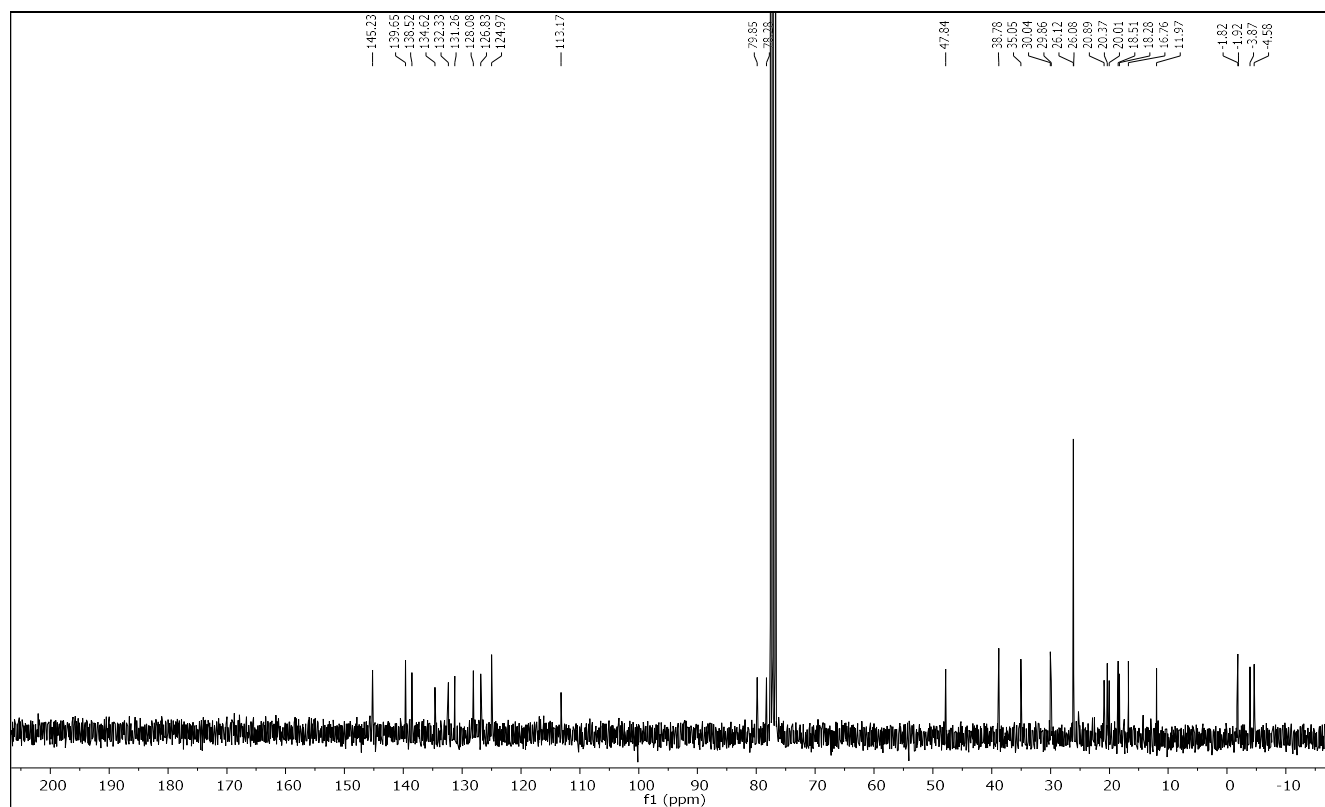

**<sup>1</sup>H-NMR spectrum of compound 24a/24b (300 MHz, CDCl<sub>3</sub>):**

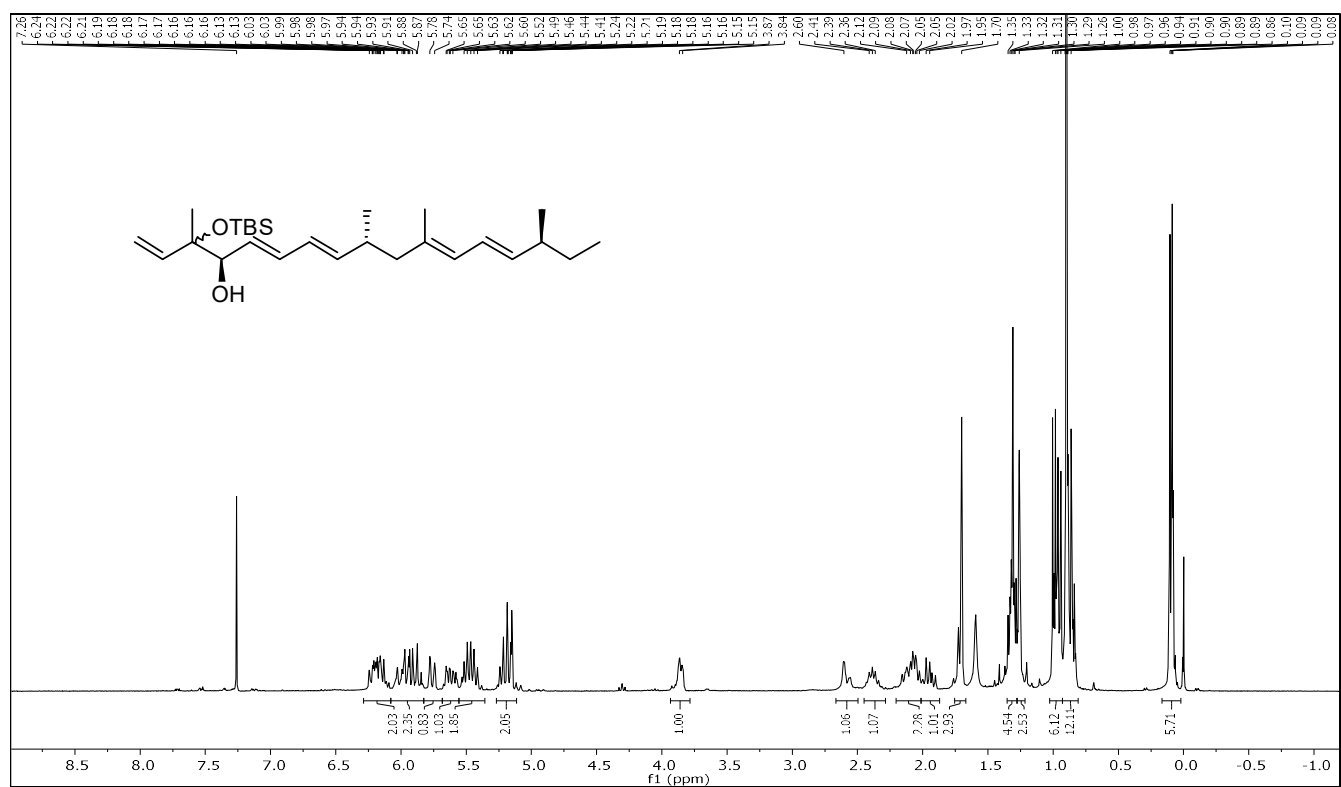

**<sup>13</sup>C-NMR spectrum of compound 24a/24b (75 MHz, CDCl<sub>3</sub>):**

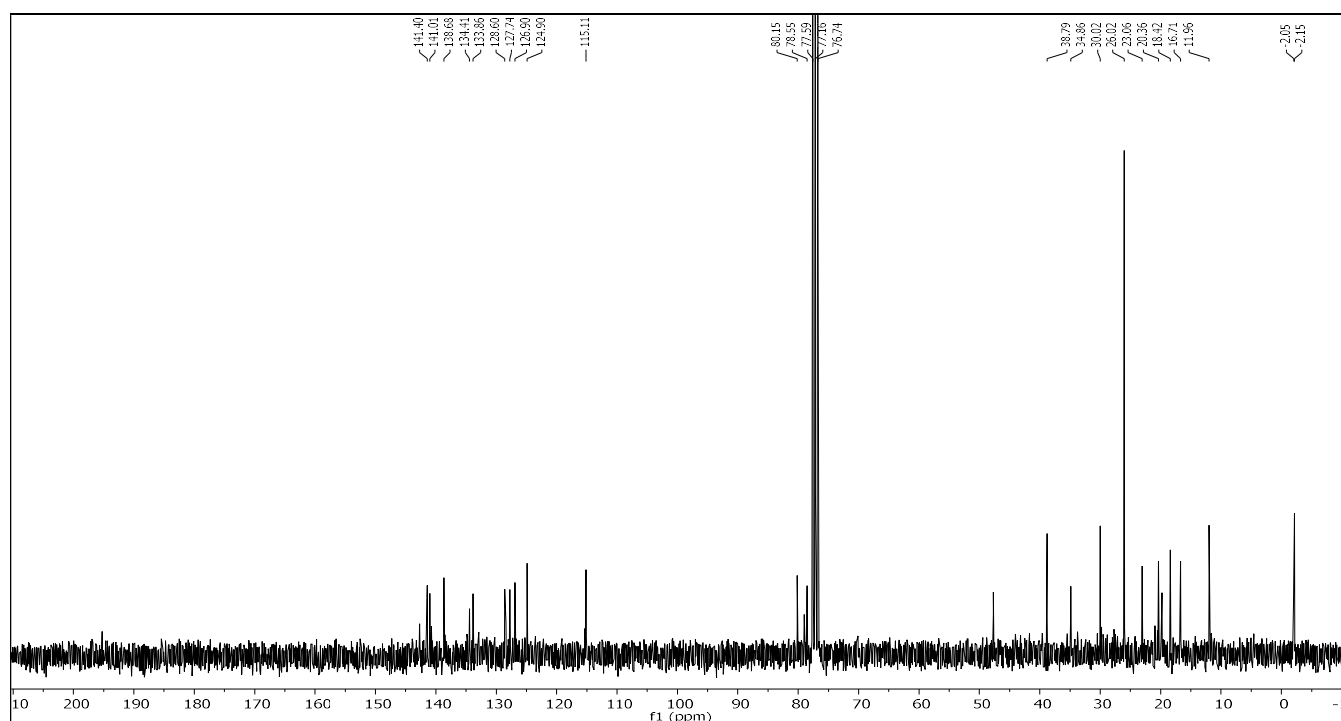

**$^1\text{H-NMR}$  spectrum of compound 6a/6b (300 MHz,  $\text{CDCl}_3$ ):**

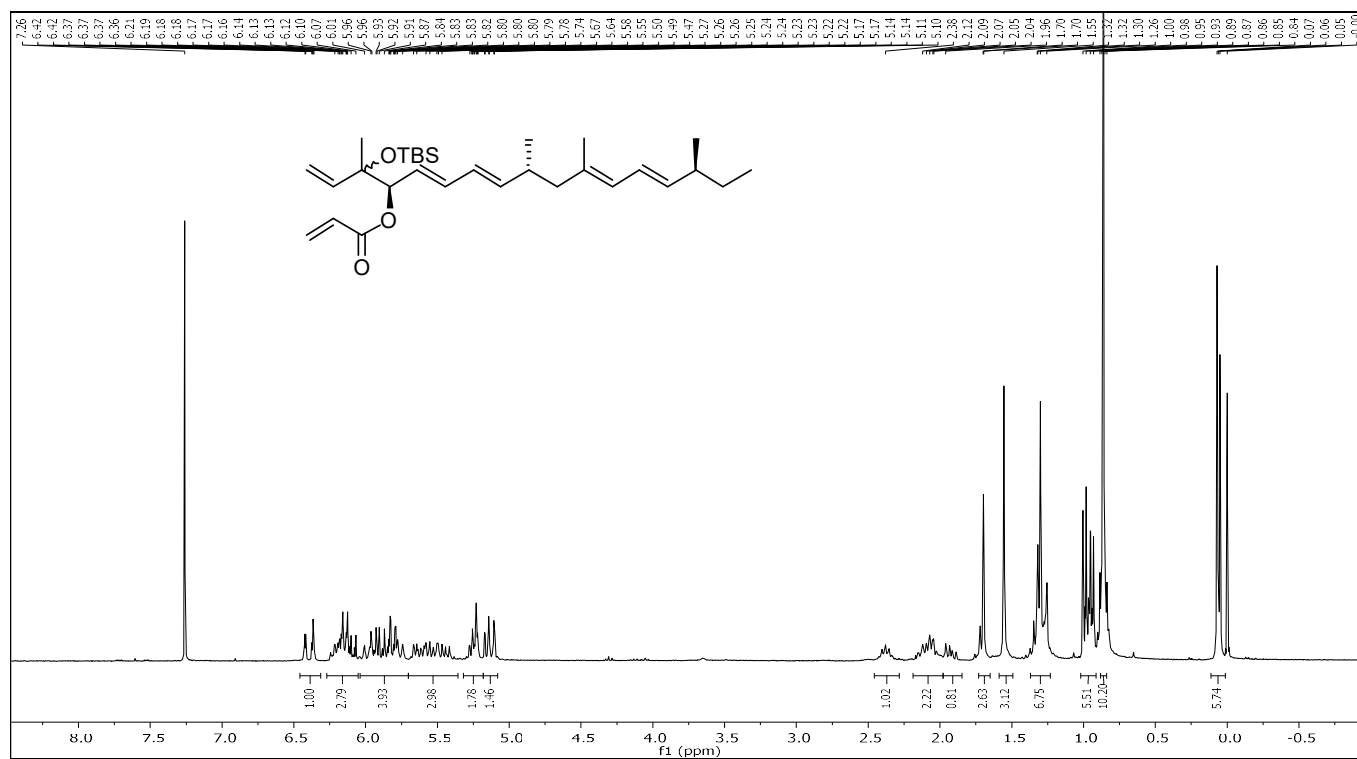

**$^{13}\text{C-NMR}$  spectrum of compound 6a/6b (75 MHz,  $\text{CDCl}_3$ ):**

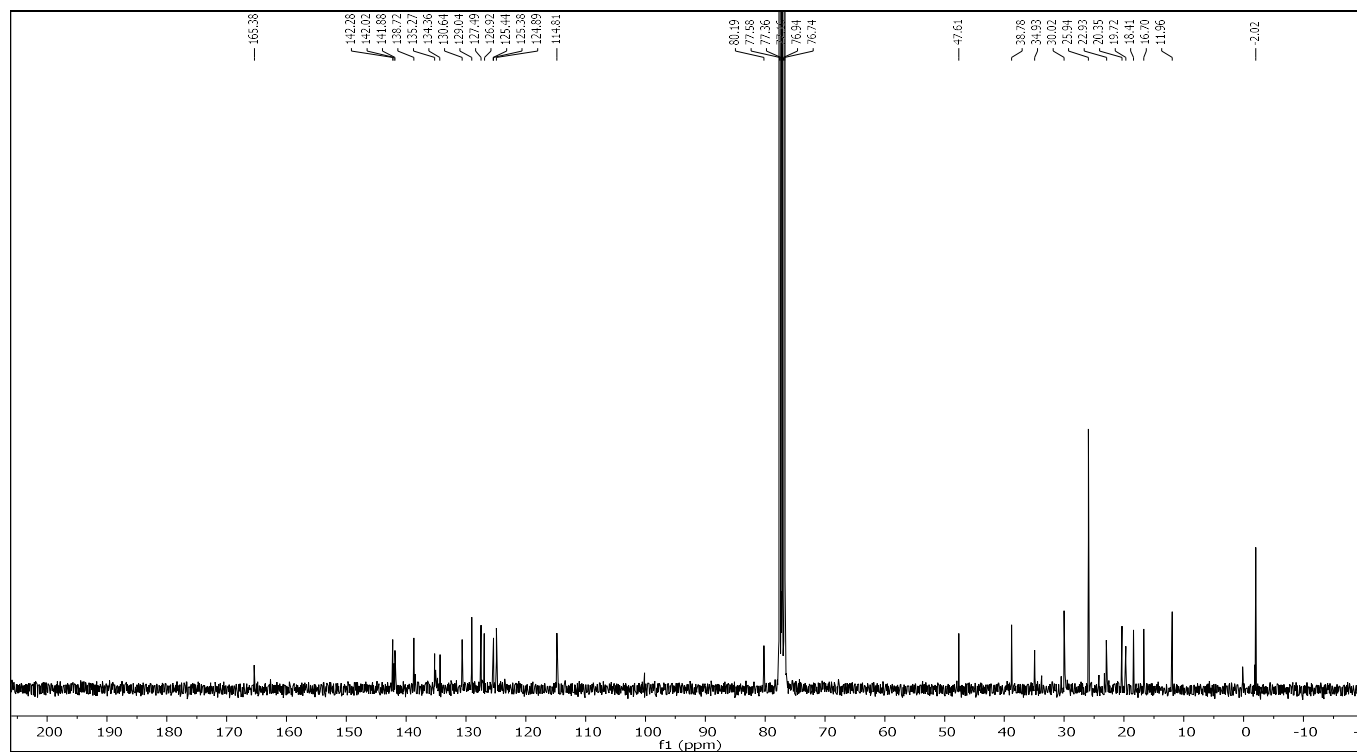



**<sup>1</sup>H-NMR spectrum of compound 25 (300 MHz, CDCl<sub>3</sub>):**

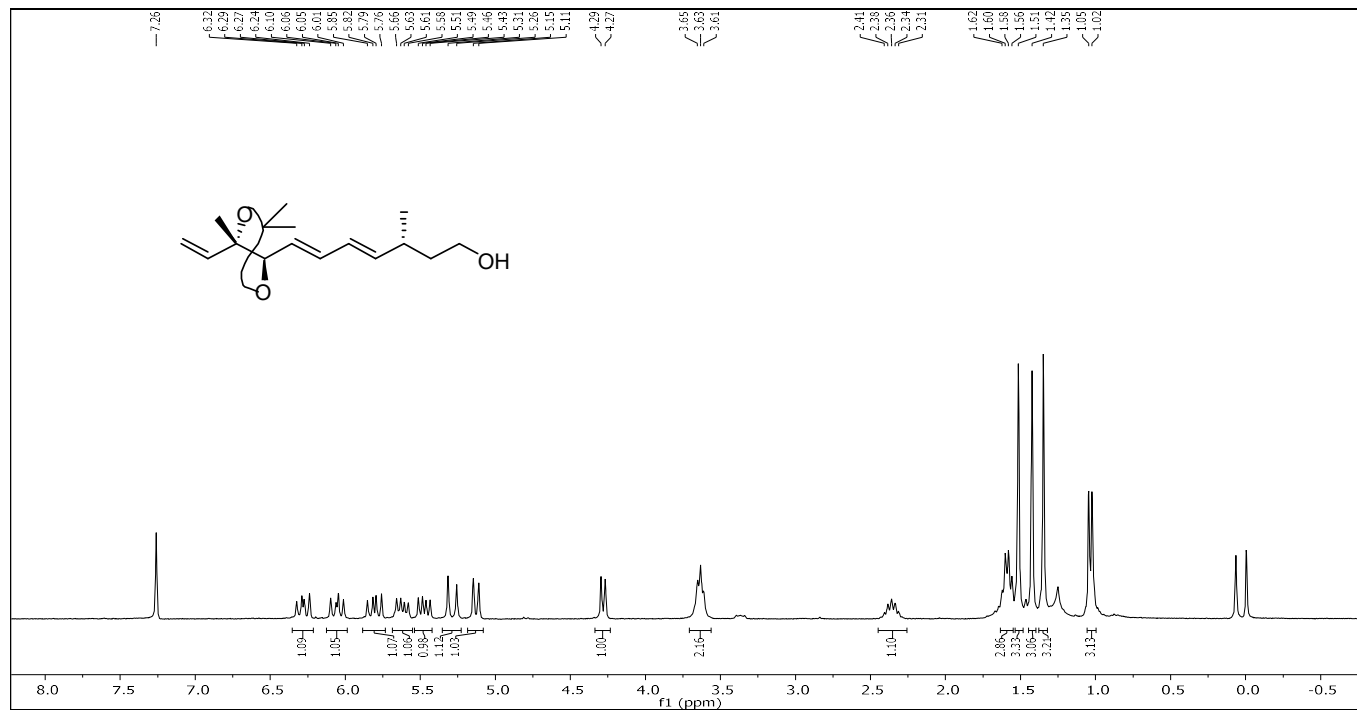

**<sup>13</sup>C-NMR spectrum of compound 25 (75 MHz, CDCl<sub>3</sub>):**

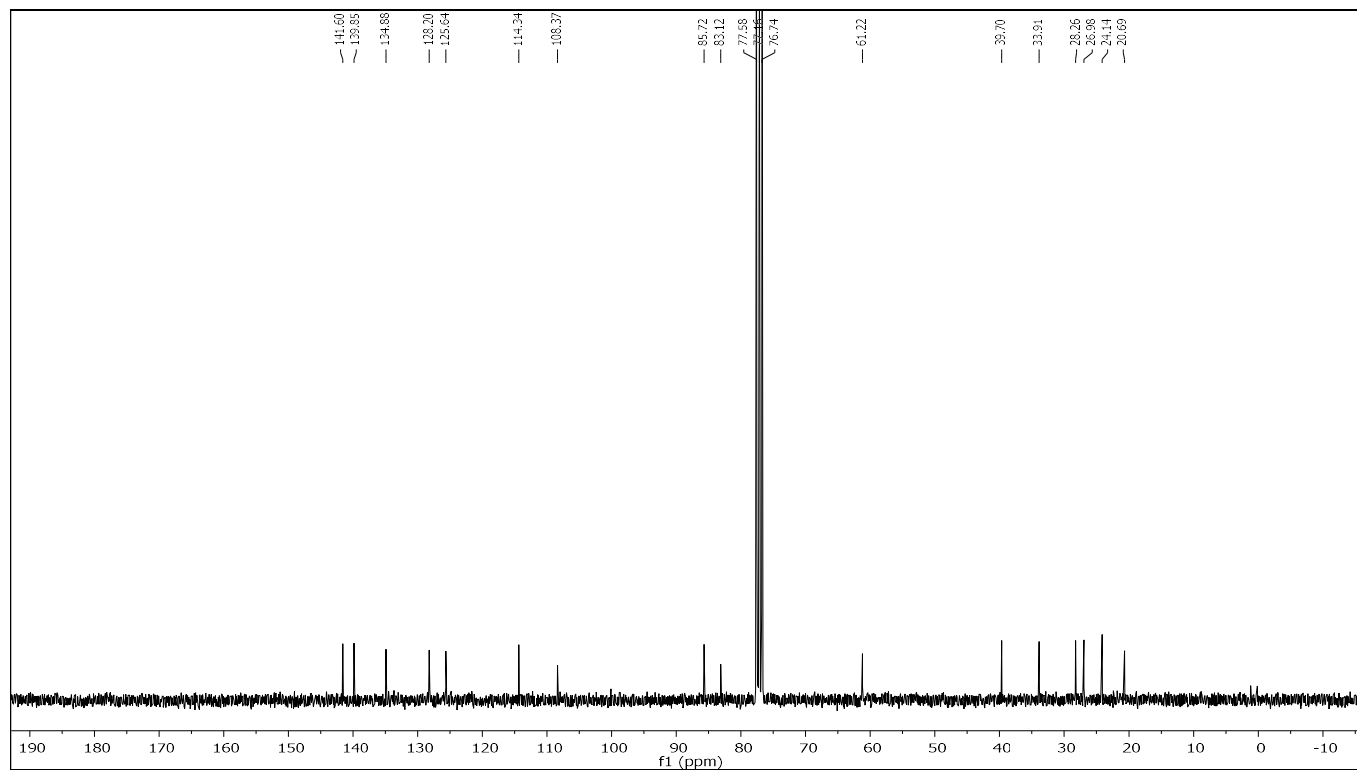

**<sup>1</sup>H-NMR spectrum of compound 26 (300 MHz, CDCl<sub>3</sub>):**

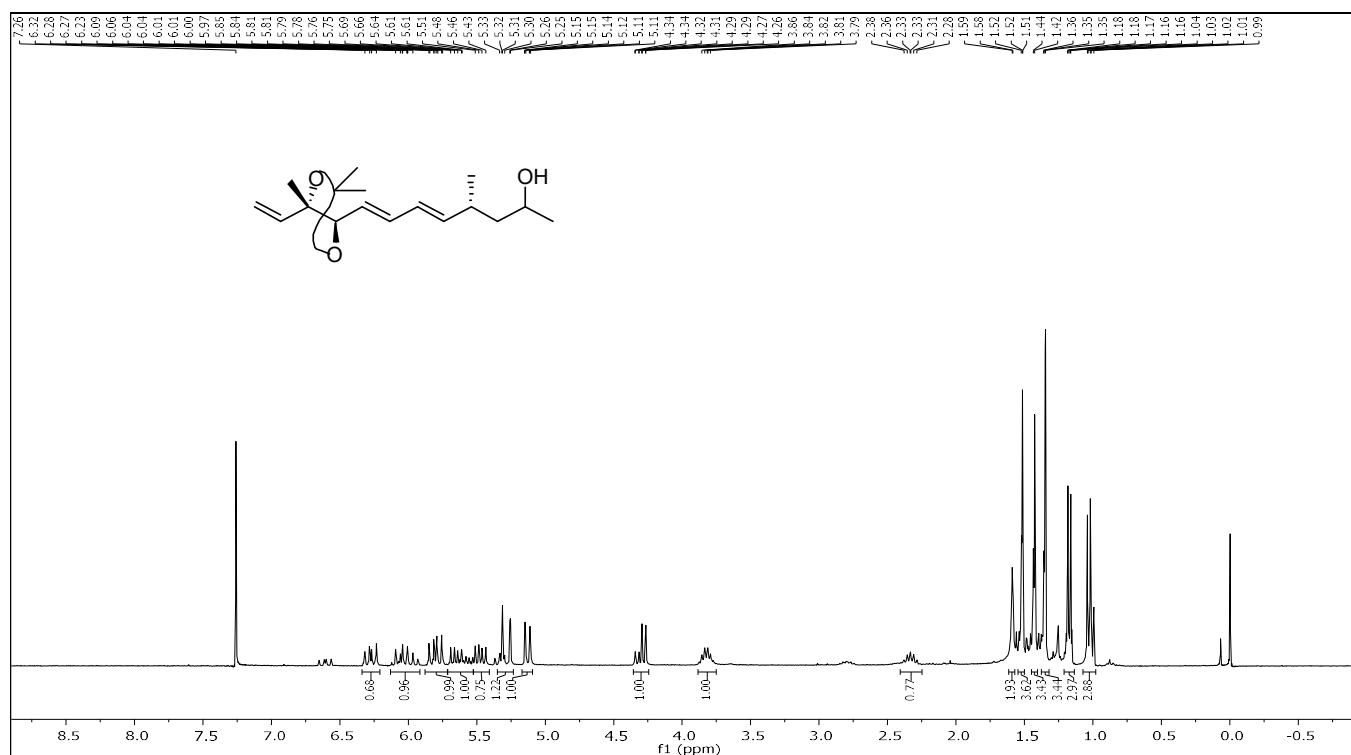

**<sup>13</sup>C-NMR spectrum of compound 26 (75 MHz, CDCl<sub>3</sub>):**

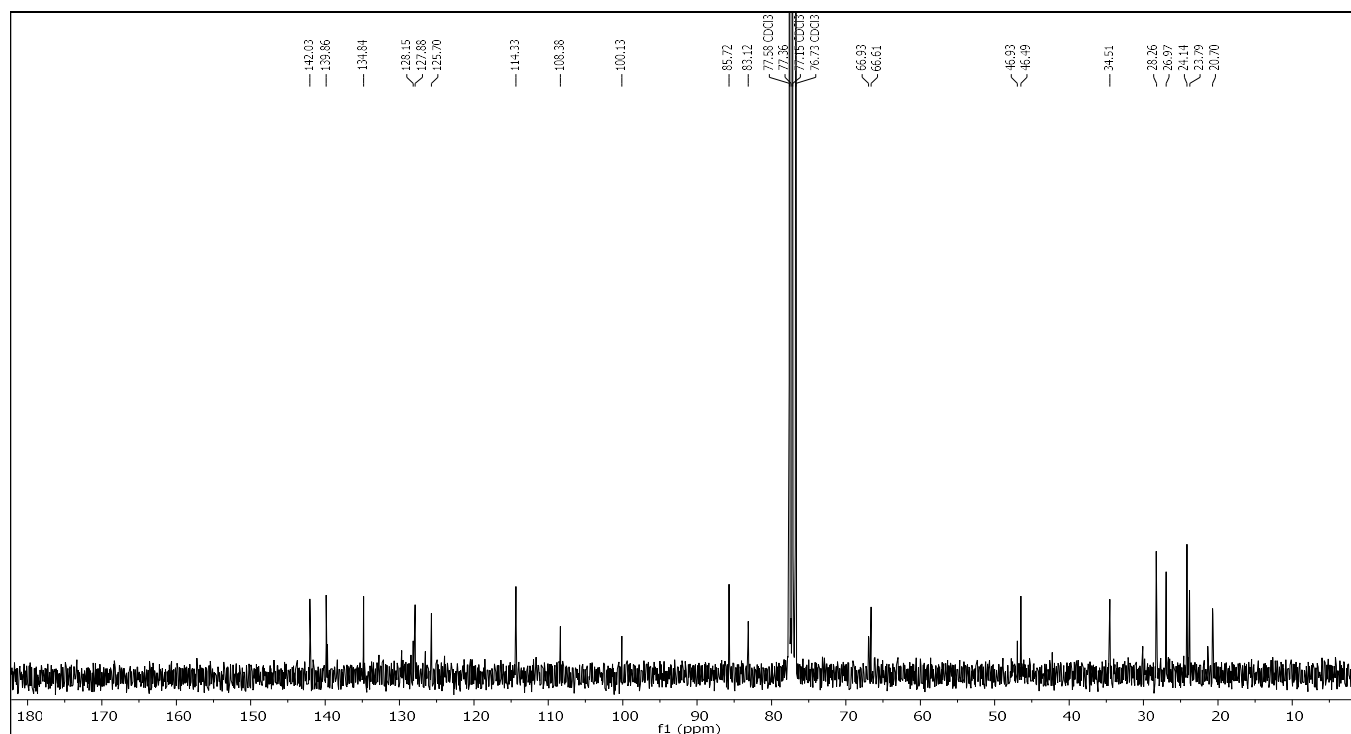

**<sup>1</sup>H-NMR spectrum of compound 27 (300 MHz, CDCl<sub>3</sub>):**

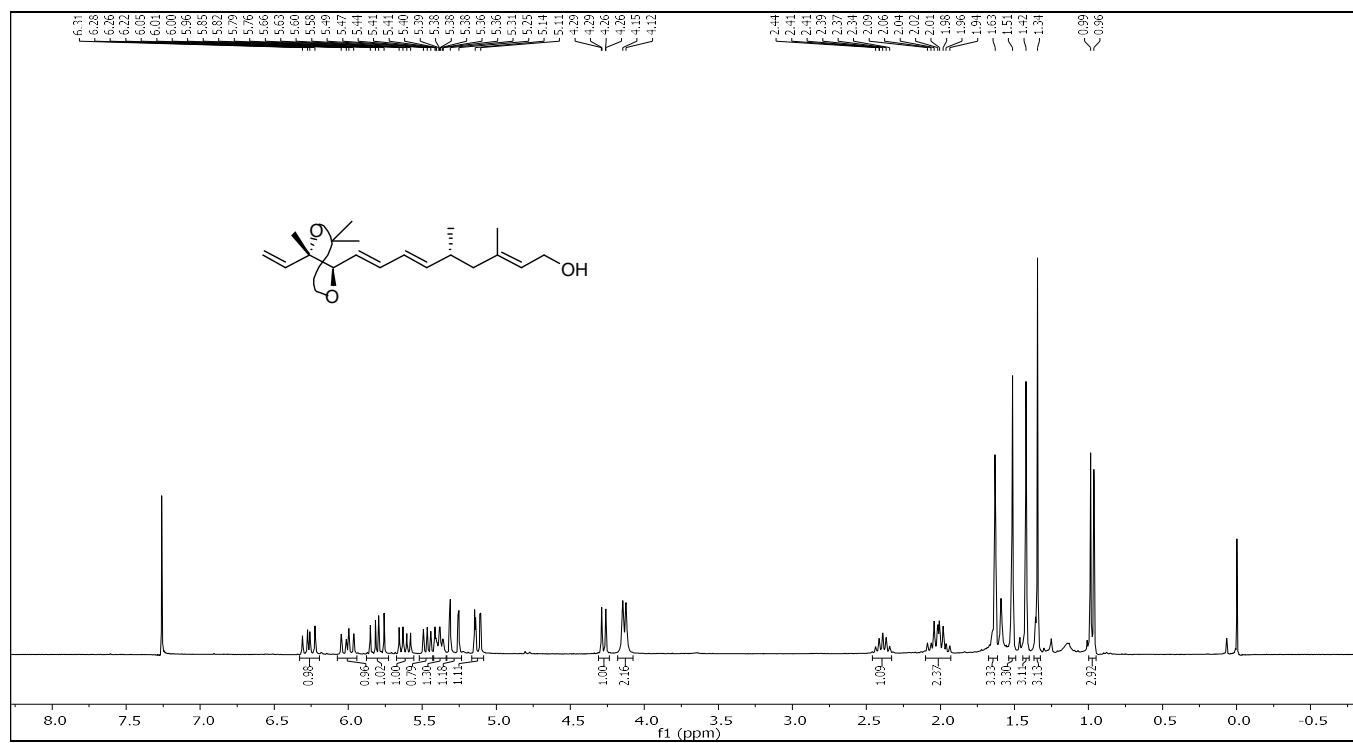

**<sup>13</sup>C-NMR spectrum of compound 27 (75 MHz, CDCl<sub>3</sub>):**

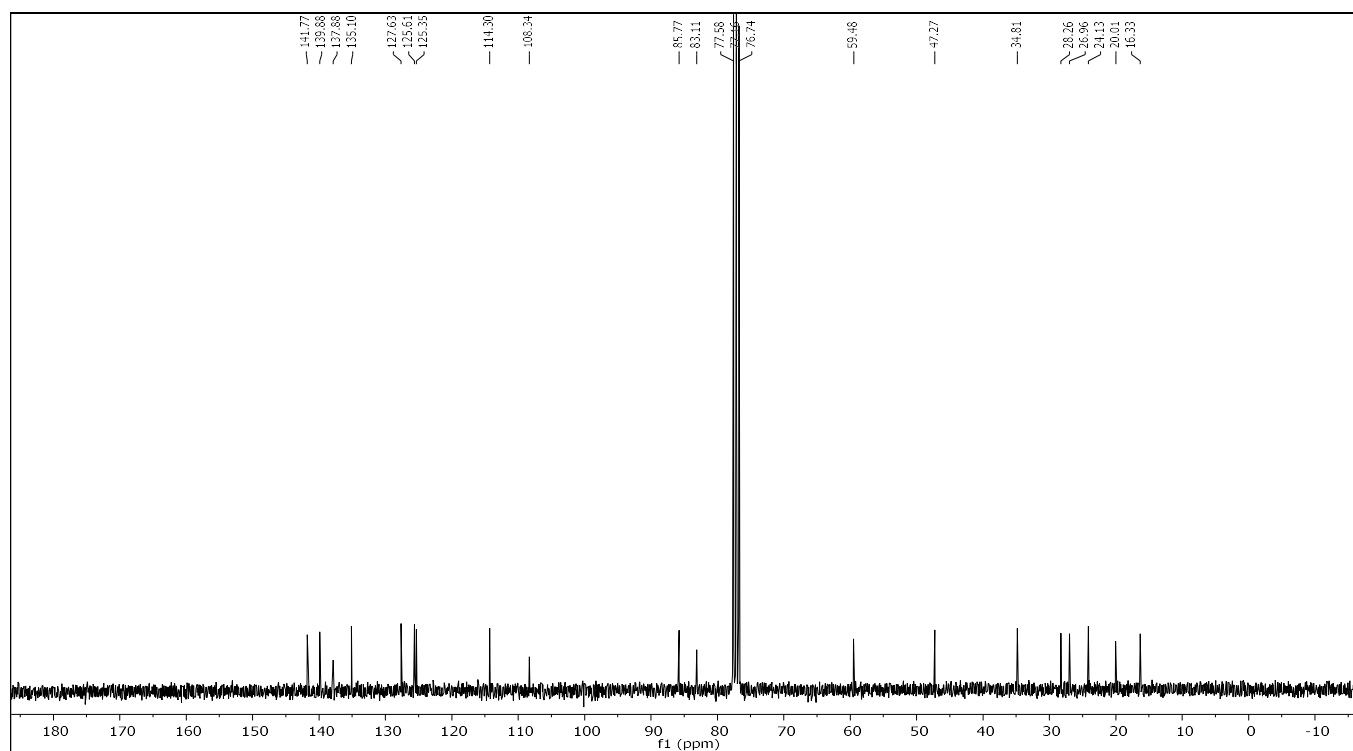

NOESY- spectrum of compound 27 (300 MHz, CDCl<sub>3</sub>):

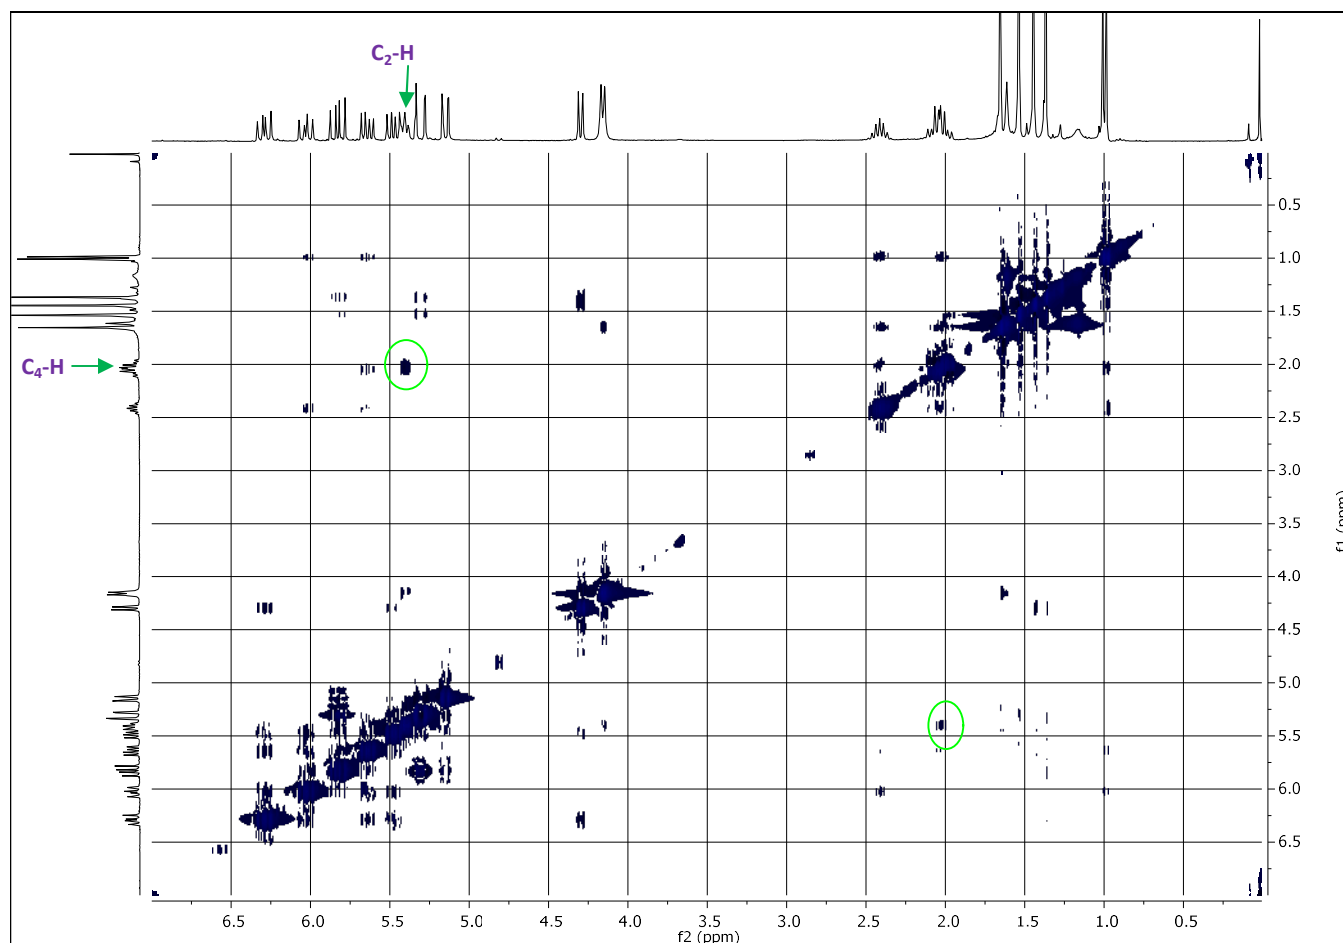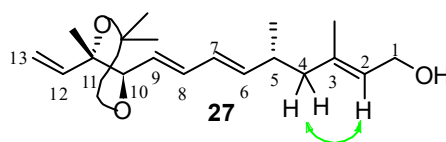

**<sup>1</sup>H-NMR spectrum of compound 28 (300 MHz, CDCl<sub>3</sub>):**

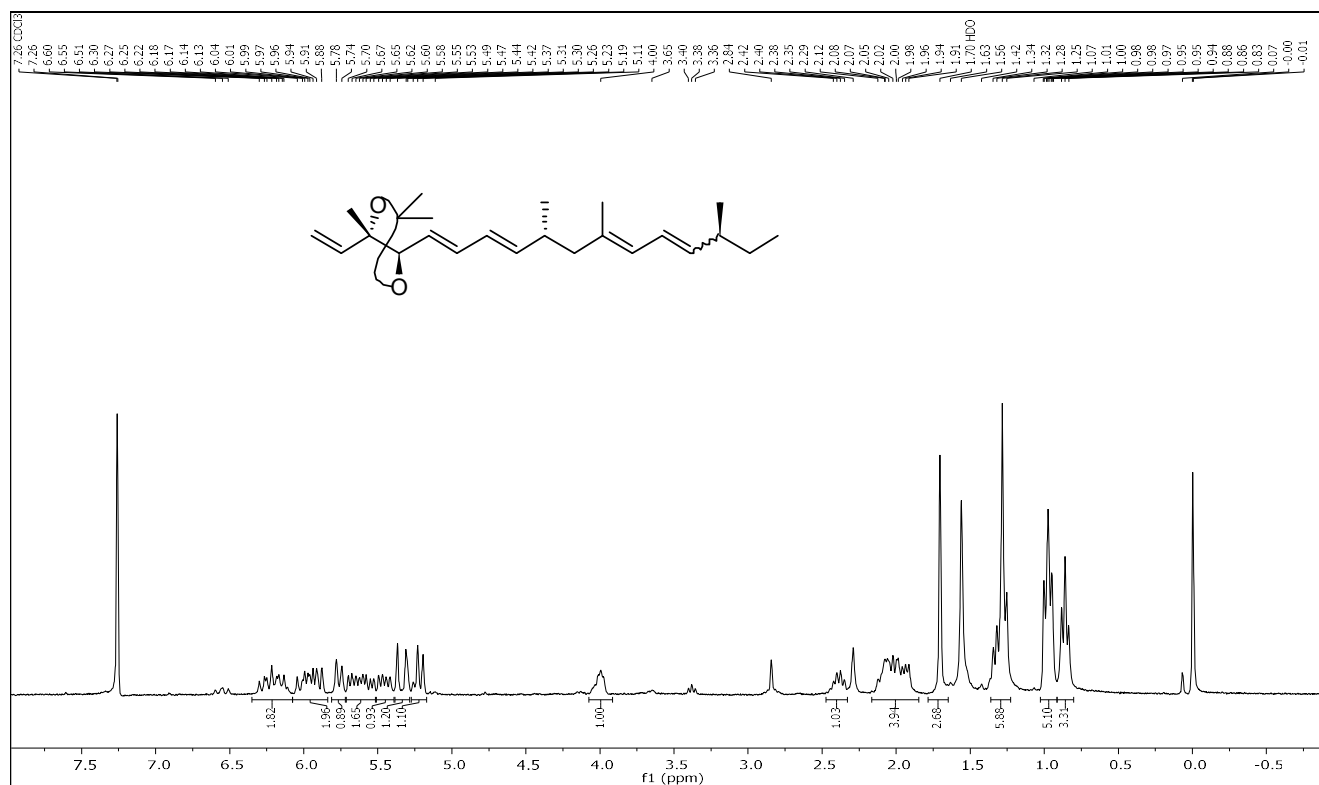

**<sup>13</sup>C-NMR spectrum of compound 28 (75 MHz, CDCl<sub>3</sub>):**

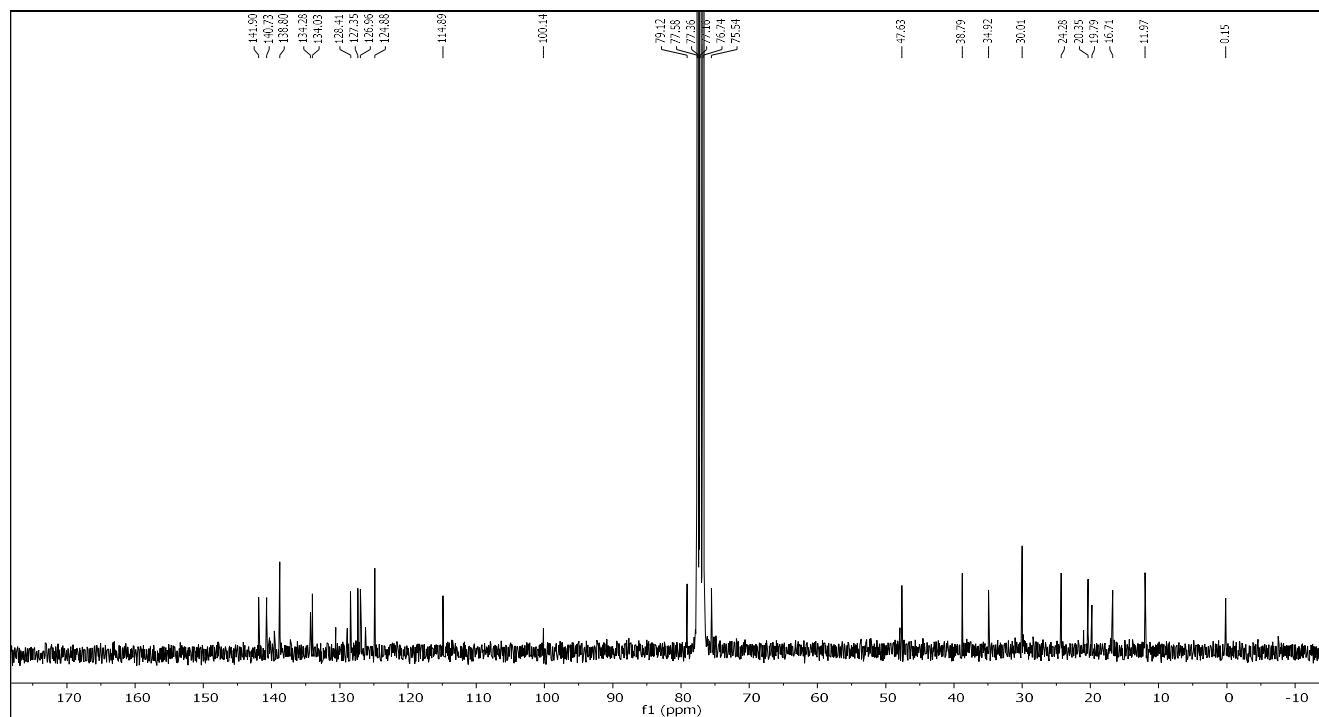

**<sup>1</sup>H-NMR spectrum of compound 29 (300 MHz, CDCl<sub>3</sub>):**

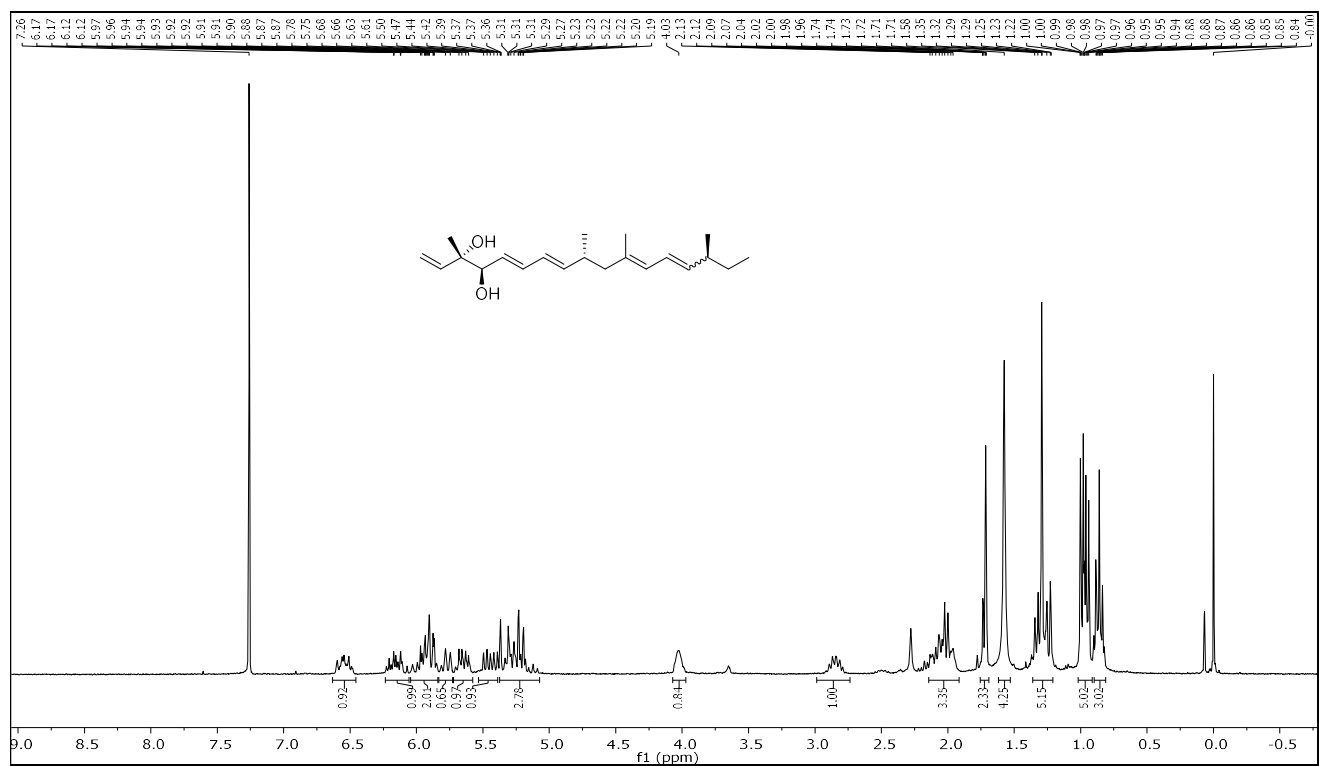

**<sup>13</sup>C-NMR spectrum of compound 29 (75 MHz, CDCl<sub>3</sub>):**

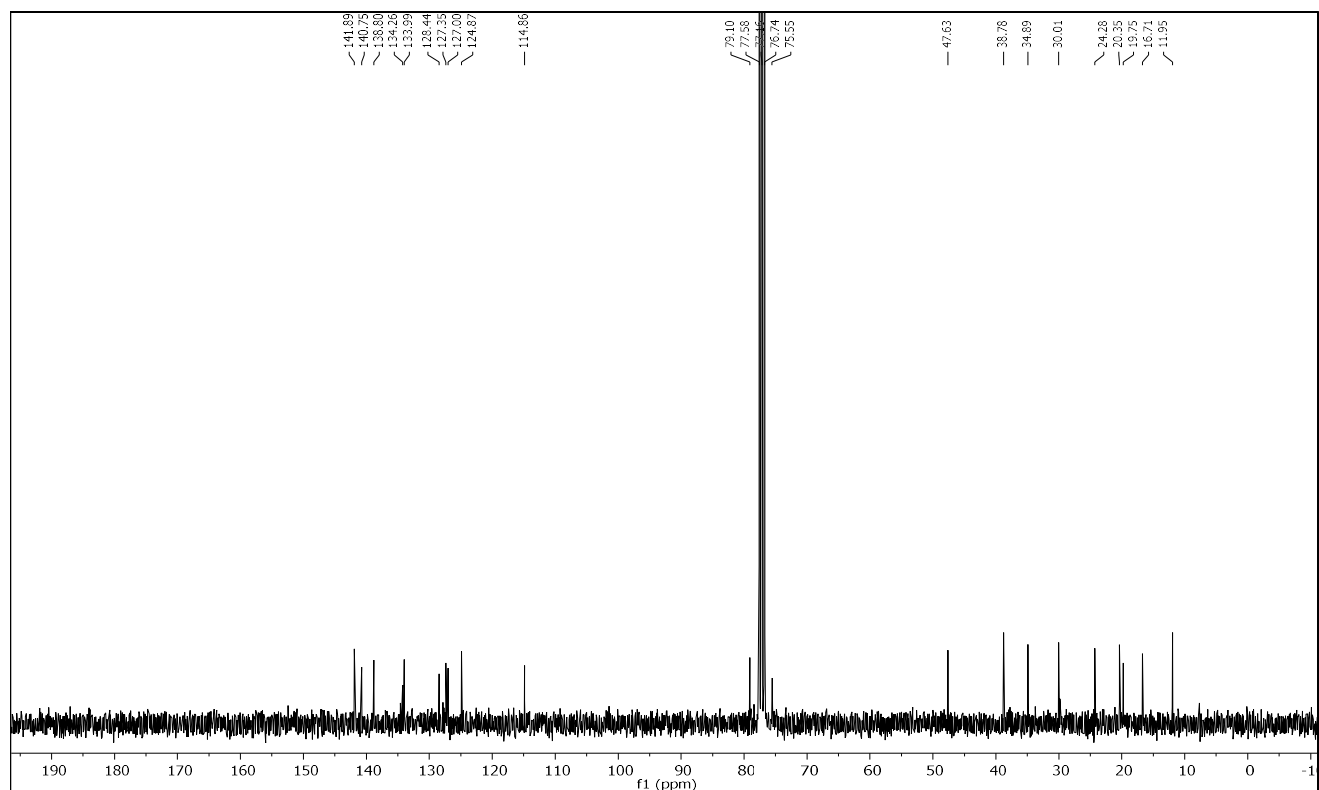

**<sup>1</sup>H-NMR spectrum of compound 30 (300 MHz, CDCl<sub>3</sub>):**

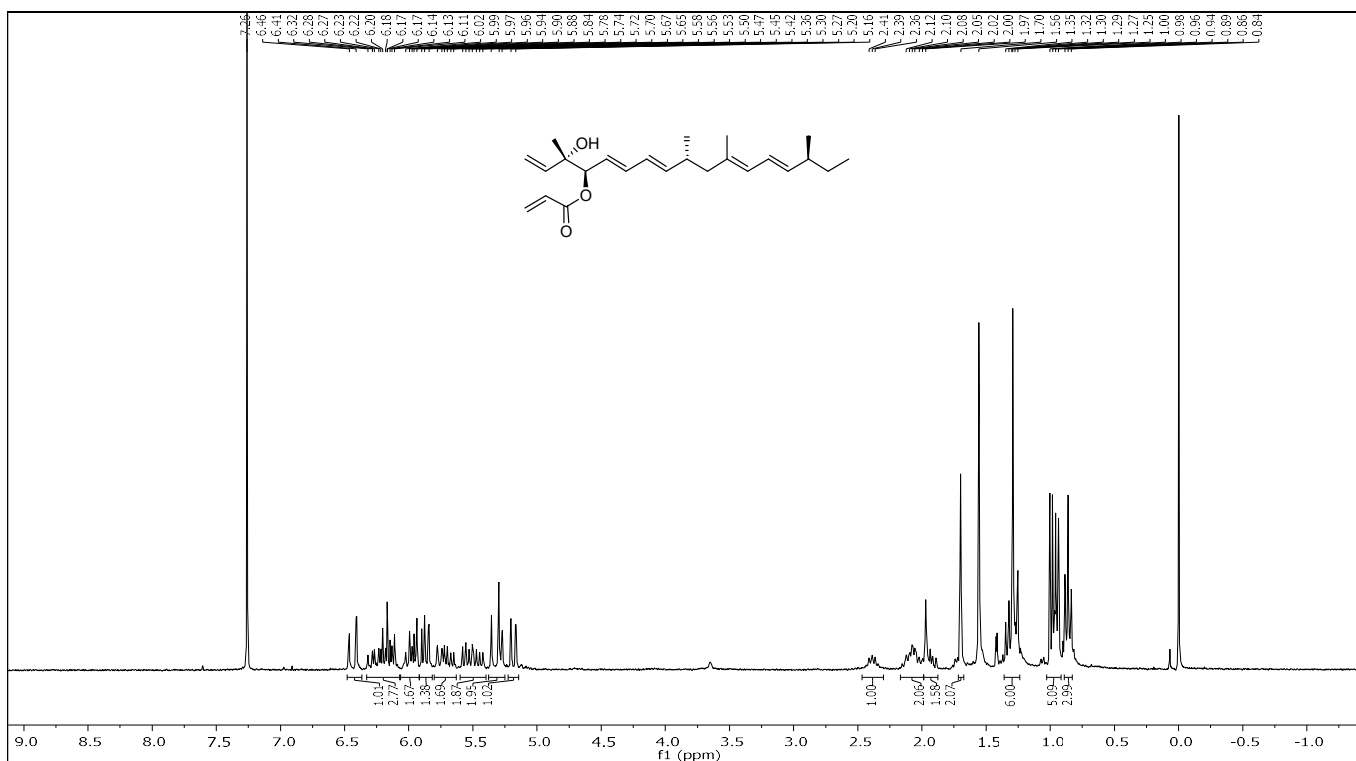

**<sup>13</sup>C-NMR spectrum of compound 30 (75 MHz, CDCl<sub>3</sub>):**

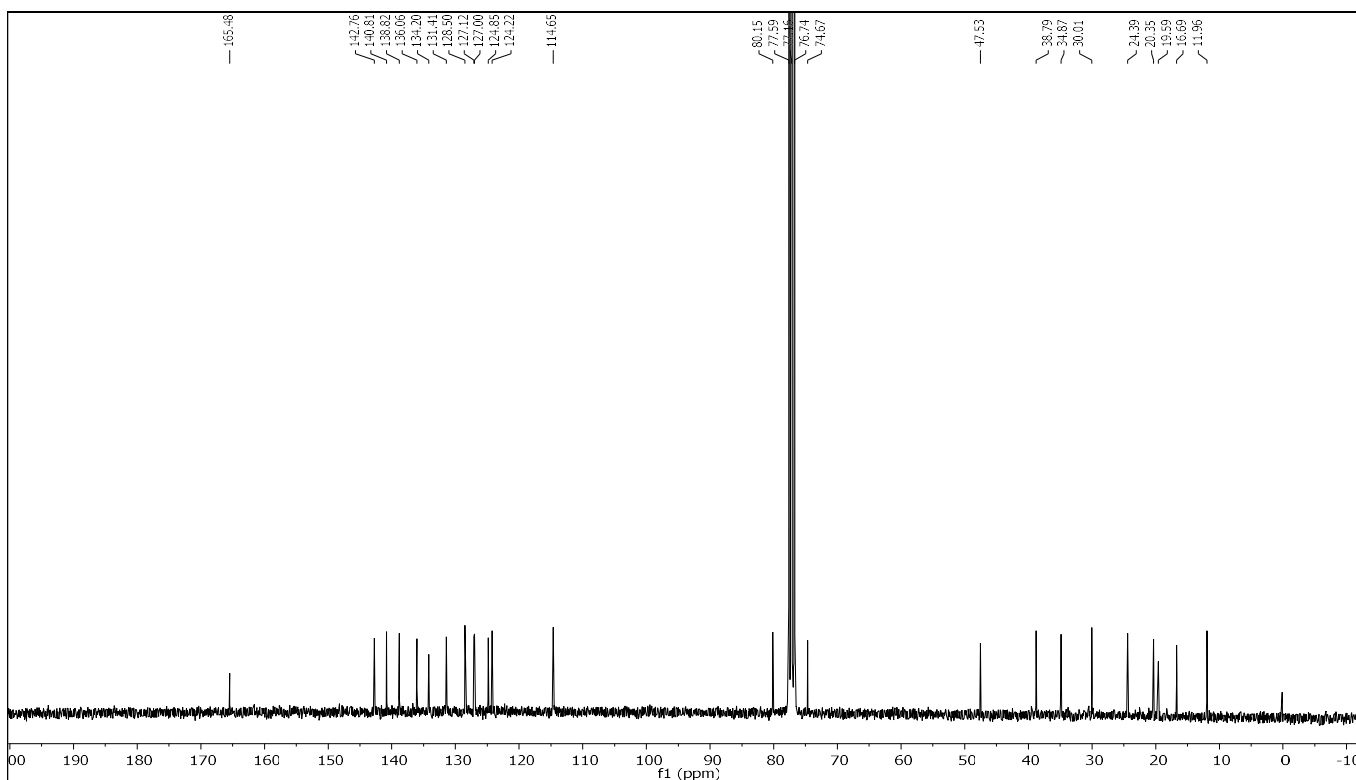

**<sup>1</sup>H-NMR spectrum of compound 5 (300 MHz, CDCl<sub>3</sub>):**

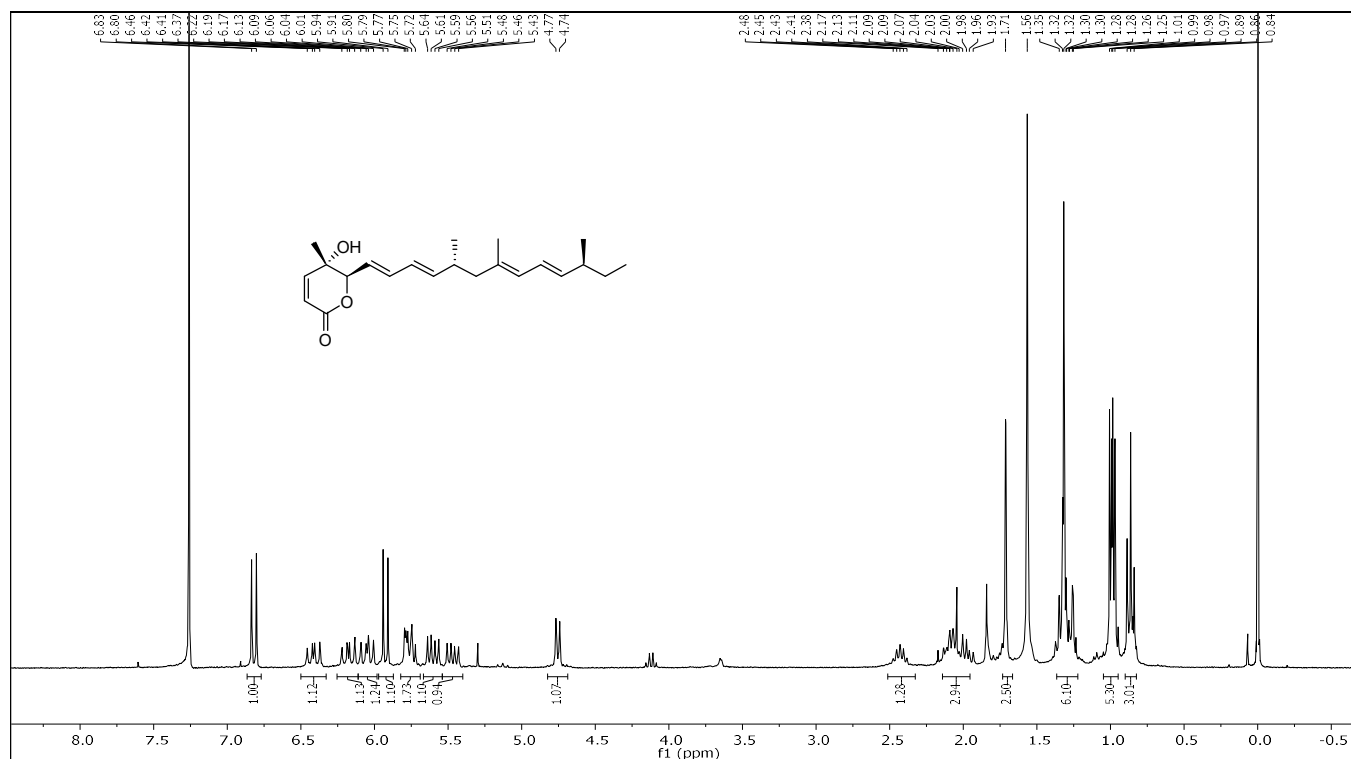

**<sup>1</sup>H-NMR spectrum of compound 5 (500 MHz, DMSO-d<sub>6</sub>):**

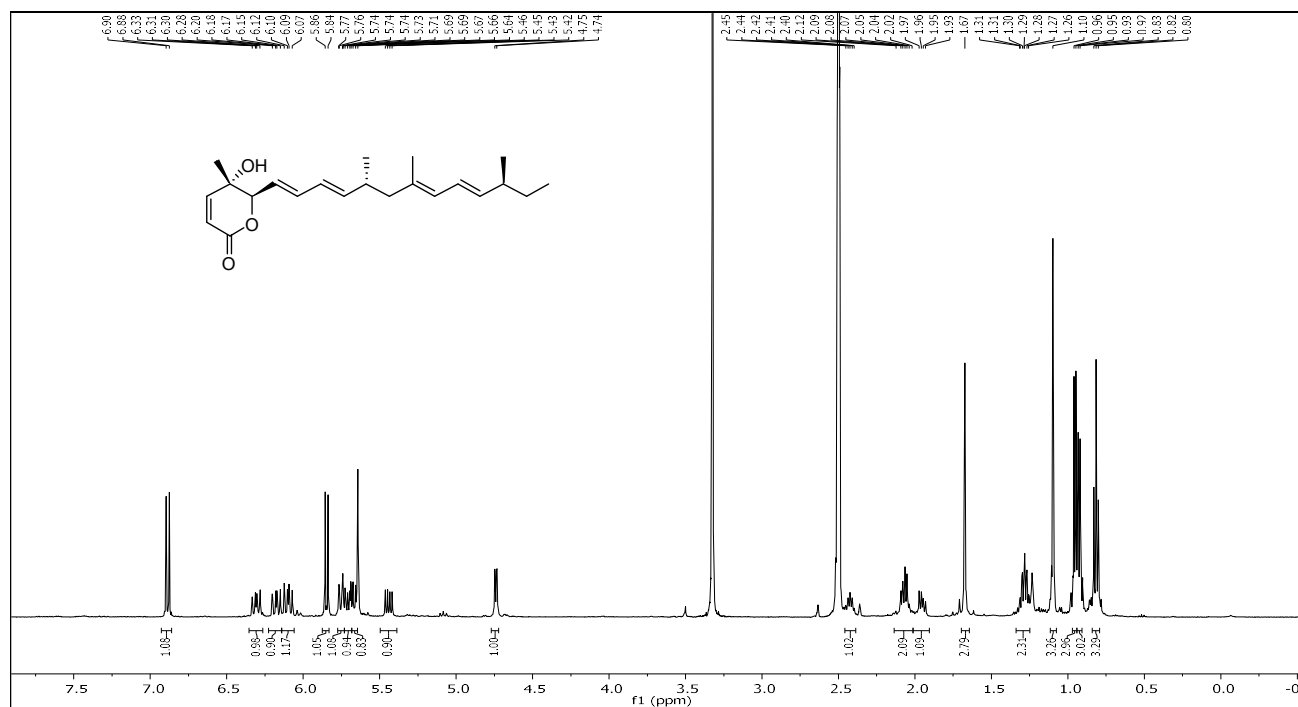



**$^{13}\text{C}$ -NMR spectrum of compound 5 (125 MHz, DMSO- $d_6$ ):**

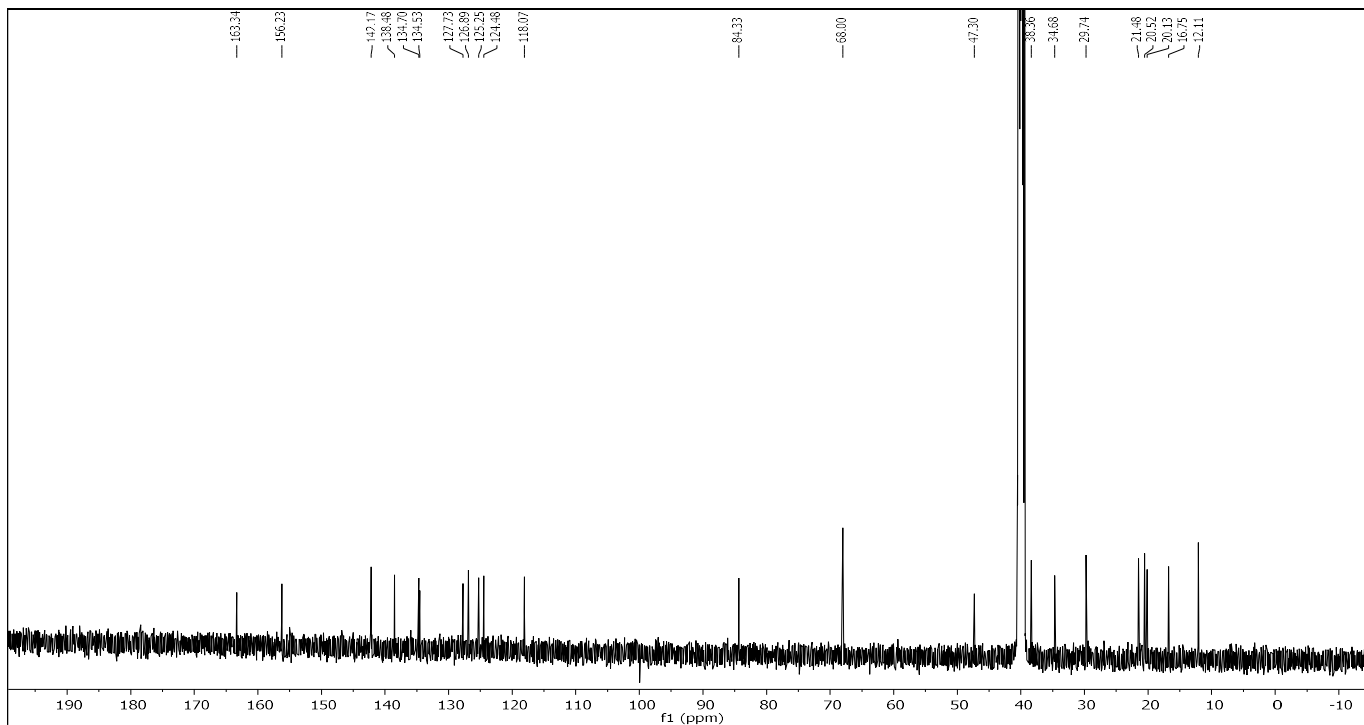

**HSQC spectrum of compound 5 (500 MHz, DMSO- $d_6$ ):**

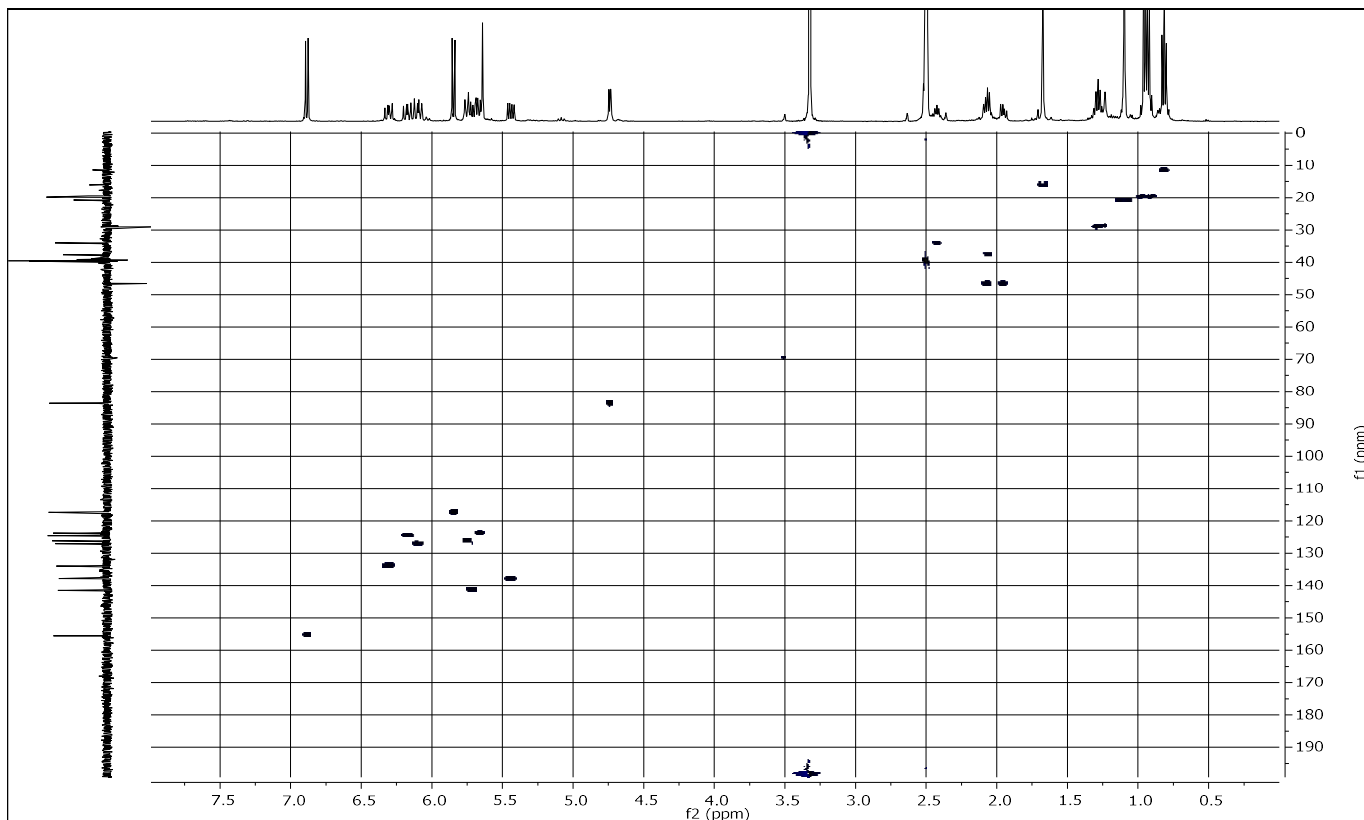

**COSY spectrum of compound 5 (400 MHz, DMSO-d<sub>6</sub>):**

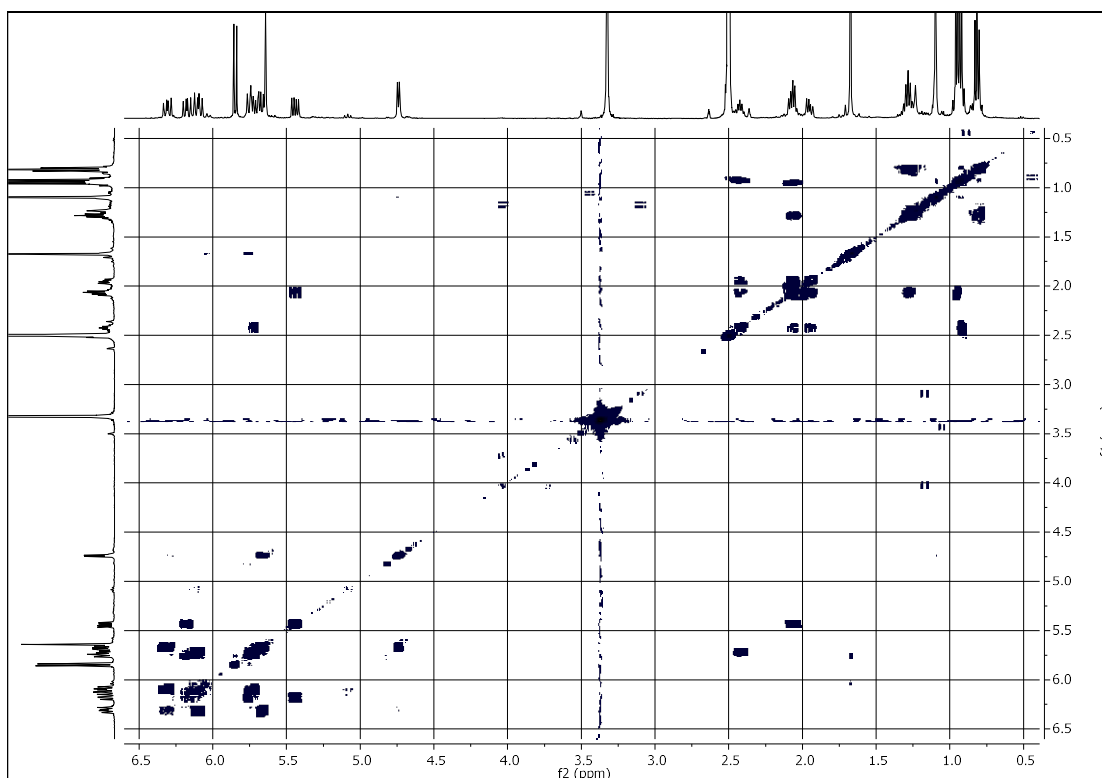

**NOESY spectrum of compound 5 (500 MHz, DMSO-d<sub>6</sub>):**

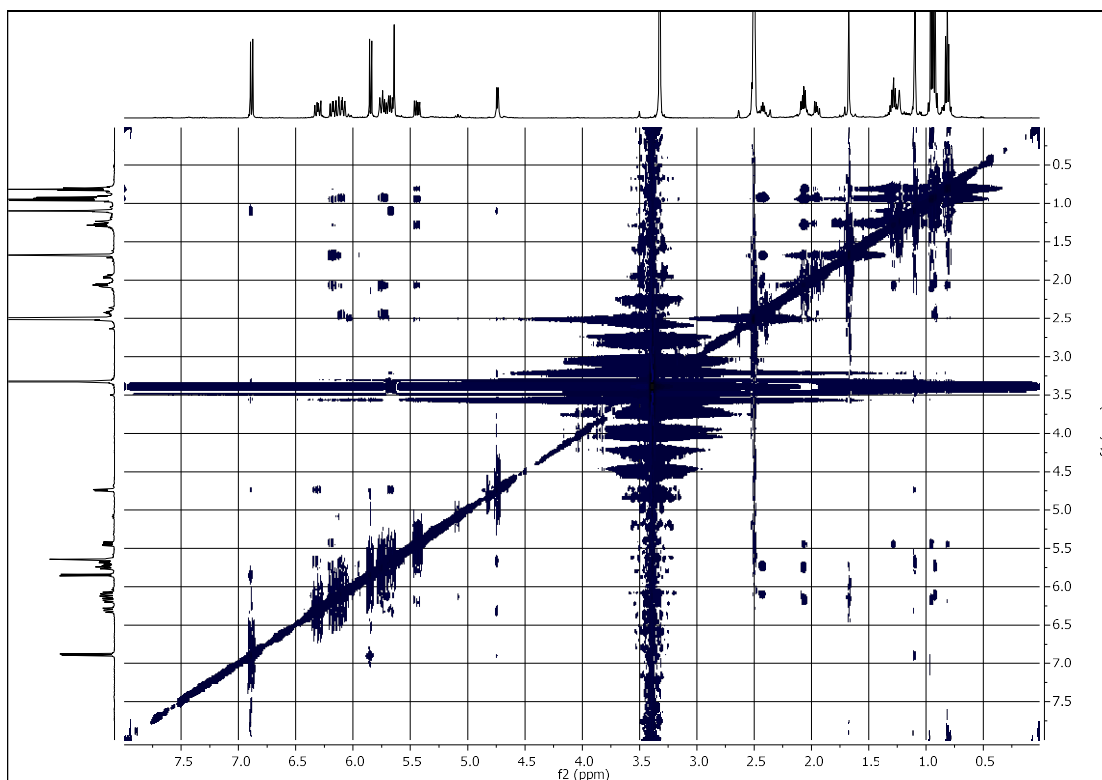

# HRMS spectrum of compound 5:

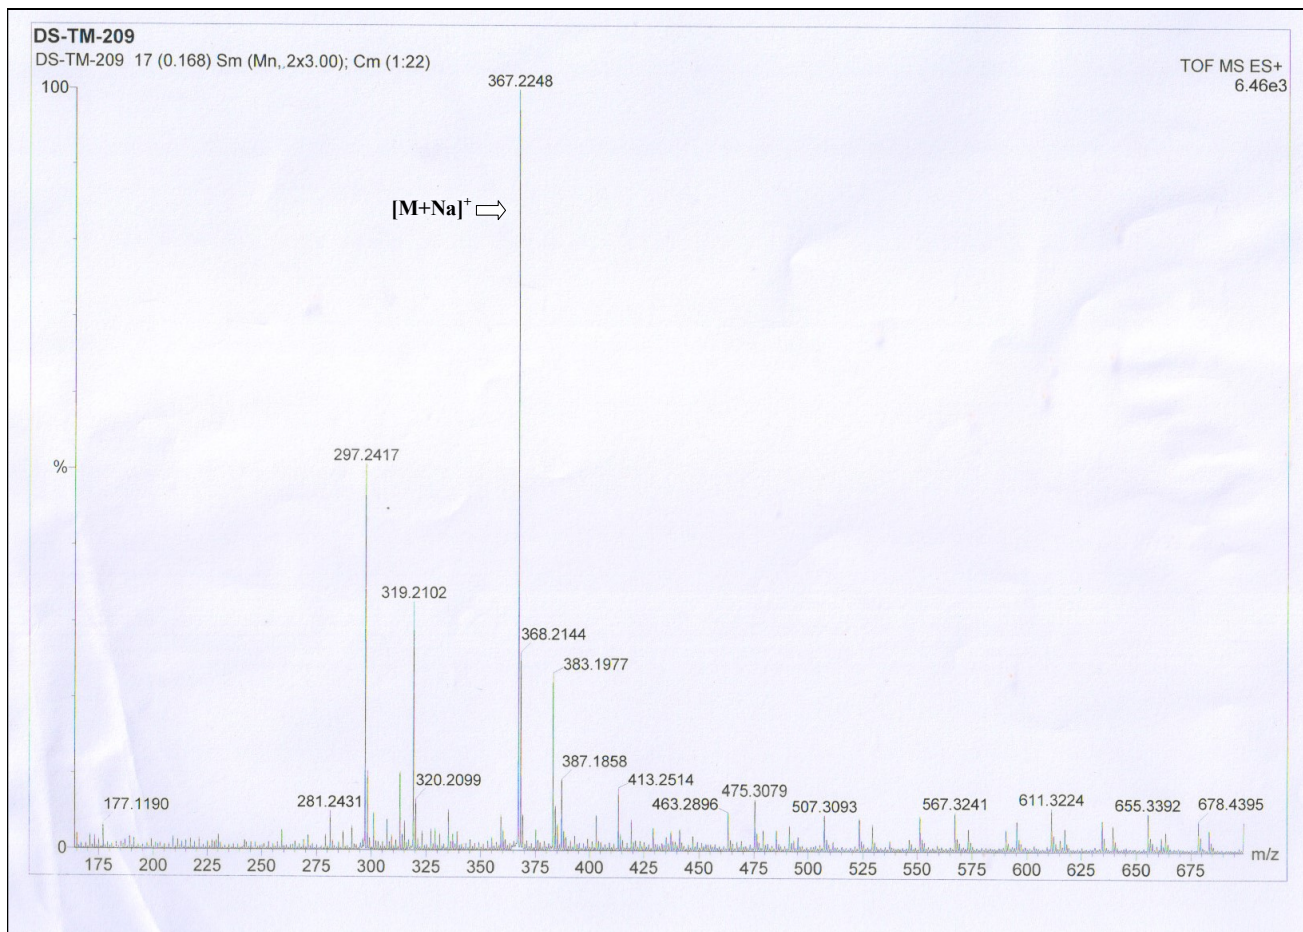

Supplement: d0ob00370k1.pdf [file d0ob00370k1.pdf]
